# Supplementary material for: Synthesis, characterization and structure-property relations in mullite-type Pb2(Pb1−x Sn x )O4 solid solution
Source: publisher site journal article supplement (doi:10.1515/zkri-2024-0088), 2024-07-14
Supplement: Supplementary file 1 [file j_zkri-2024-0088_suppl_001.docx]

**Supplementary Information**

Synthesis, characterization and structure-property relations in mullite-type Pb2(Pb1-xSnx)O4 solid solution.

Christopher S. Reuter1, M. Mangir Murshed1,2*, Michael Fischer2,3,4, Thorsten. M. Gesing1,2

1University of Bremen, Institute of Inorganic Chemistry and Crystallography, Leobener Straße 7, D-28359 Bremen, Germany

2University of Bremen, MAPEX Center for Materials and Processes, Bibliothekstraße 1, D-28359 Bremen, Germany

3University of Bremen, Crystallography, Faculty of Geosciences, Klagenfurter Straße 2-4, D-28359 Bremen, Germany

4University of Bremen, BCCMS Bremen Center for Computational Materials Science, Am Fallturm 1, D-28359 Bremen, Germany

*Corresponding author: e-mail address: [murshed@uni-bremen.de](mailto:murshed@uni-bremen.de), phone: +49 (0)421 218 63144

#ORCID:

CSR: 0000-0002-7983-7457

MMM: 0000-0002-9063-372X

MF: 0000-0001-5133-1537

TMG: 0000-0002-4119-2219

**Table S1:** Evolution of the bond length and angular changes index ofPb2(Pb1-xSnx)O4 with respect to compositional x.

|  | **Pb2(Pb1-xSnx)O4** | | | | | | | | |
| --- | --- | --- | --- | --- | --- | --- | --- | --- | --- |
| ***x*** | **0** | **0.3** | **0.4** | **0.5** | **0.6** | **0.7** | **0.8** | **0.9** | **1** |
|  | **bond length/ pm** | | | | | | | | |
| M-O(2) x2 | 239.76(4) | 243.19(1) | 220.39(1) | 214.13(1) | 217.73(1) | 212.59(1) | 205.85(1) | 203.47(1) | 205.98(1) |
| M-O(11) x2 | 214.15(1) | 214.71(1) | 212.26(1) | 211.79(1) | 206.75(1) | 208.86(1) | 206.64(1) | 203.68(1) | 209.63(1) |
| M-O(12) x2 | 214.15(1) | 203.89(1) | 192.27(1) | 202.69(1) | 206.89(1) | 209.43(1) | 207.30(1) | 208.82(1) | 193.93(1) |
| Pb(21)-O(2) x2 | 211.93(3) | 215.11(1) | 223.17(1) | 234.46(1) | 234.29(1) | 237.43(1) | 230.03(1) | 230.42(1) | 224.79(1) |
| Pb(22)-O(2) x2 | 211.93(3) | 205.33(1) | 210.66(1) | 204.65(1) | 202.69(1) | 202.04(1) | 211.45(1) | 211.97(1) | 214.57(1) |
| Pb(21)-O(11) x1 | 239.23(4) | 216.76(1) | 227.65(1) | 218.38(1) | 228.64(1) | 228.88(1) | 234.58(1) | 235.44(1) | 229.08(1) |
| Pb(21)-O(11) x1 | 274.32(4) | 290.00(1) | 281.55(1) | 293.00(1) | 285.94(1) | 280.27(1) | 276.46(1) | 278.89(1) | 281.82(1) |
| Pb(22)-O(12) x1 | 239.23(4) | 248.97(1) | 272.94(1) | 255.39(1) | 243.72(1) | 238.27(1) | 239.33(1) | 236.47(1) | 253.44(1) |
| Pb(22)-O(12) x1 | 274.32(4) | 280.36(1) | 273.38(1) | 274.25(1) | 279.51(1) | 282.44(1) | 280.79(1) | 280.15(1) | 278.74(1) |
|  | **dihedral angle/ °** | | | | | | | | |
| O(2)-O(12)-O(12)-O(2) x2 | 69.55(1) | 76.96(1) | 74.28(1) | 74.04(1) | 73.62(1) | 72.82(1) | 74.22(1) | 74.91(1) | 75.36(1) |
| O(2)-O(11)-O(11)-O(2) x2 | 69.55(1) | 65.58(1) | 73.88(1) | 76.24(1) | 73.77(1) | 76.36(1) | 77.66(1) | 77.65(1) | 75.91(1) |
| Pb(22)-O(2)-O(12)-O(11) x2 | 138.92(1) | 135.49(1) | 131.23(1) | 134.49(1) | 139.80(1) | 138.45(1) | 135.78(1) | 136.76(1) | 132.42(1) |
| Pb(21)-O(2)-O(11)-O(12) x2 | 138.92(1) | 144.78(1) | 144.72(1) | 138.26(1) | 133.50(1) | 133.77(1) | 135.52(1) | 133.64(1) | 138.72(1) |
|  | **angle/ °** | | | | | | | | |
| O(11)-M-O(12) x2 | 101.43(2) | 105.90(1) | 109.25(1) | 103.26(1) | 102.51(1) | 100.42(1) | 101.32(1) | 101.00(1) | 104.38(1) |
| O(12)-M-O(12) x1 | 79.91(1) | 66.39(1) | 60.65(1) | 69.19(1) | 73.17(1) | 74.74(1) | 75.57(1) | 77.57(1) | 70.27(1) |
| O(11)-M-O(11) x1 | 79.91(1) | 88.43(1) | 84.41(1) | 85.95(1) | 83.40(1) | 86.06(1) | 83.82(1) | 82.24(1) | 82.82(1) |
| O(2)-M-O(11) x2 | 96.17(1) | 91.66(1) | 95.29(1) | 91.48(1) | 91.72(1) | 94.06(1) | 96.99(1) | 96.16(1) | 93.72(1) |
| O(2)-M-O(11) x2 | 83.83(1) | 89.25(1) | 87.65(1) | 93.49(1) | 91.77(1) | 91.48(1) | 87.34(1) | 87.73(1) | 87.49(1) |
| O(2)-M-O(12) x2 | 83.83(1) | 73.72(1) | 79.12(1) | 77.64(1) | 79.22(1) | 79.08(1) | 81.89(1) | 82.14(1) | 82.55(1) |
| O(2)-M-O(12) x2 | 96.17(1) | 105.18(1) | 97.42(1) | 96.69(1) | 96.98(1) | 94.84(1) | 93.50(1) | 93.83(1) | 96.11(1) |
| O(2)-Pb(21)-O(2) x2 | 101.53(2) | 93.42(1) | 95.21(1) | 91.30(1) | 88.34(1) | 89.21(1) | 91.09(1) | 89.74(1) | 90.83(1) |
| O(11)-Pb(21)-O(11) x2 | 145.93(1) | 147.56(1) | 146.57(1) | 148.31(1) | 146.03(1) | 145.32(1) | 144.26(1) | 144.24(1) | 146.23(1) |
| O(2)-Pb(22)-O(2) x2 | 101.53(2) | 109.74(1) | 97.47(1) | 97.76(1) | 101.75(1) | 97.92(1) | 93.04(1) | 92.92(1) | 93.03(1) |
| O(12)-Pb(22)-O(12) x2 | 145.93(1) | 138.56(1) | 140.85(1) | 143.13(1) | 145.07(1) | 145.83(1) | 145.90(1) | 146.21(1) | 143.51(1) |

**Table S2:** Crystallographic parameters of Pb2(Pb1-xSnx)O4 in mullite-type setting

| **x = 0** | | | | | | | **x = 1.0** | | | | | | |
| --- | --- | --- | --- | --- | --- | --- | --- | --- | --- | --- | --- | --- | --- |
| **Atom** | **Ox.** | **Wyck.** | **Site** | ***x*** | ***y*** | ***z*** | **Atom** | **Ox.** | **Wyck.** | **Site** | ***x*** | ***y*** | ***z*** |
| **Pb1** | 4 | 4*d* | 2.22 | 0 | ½ | ¼ | **Sn1** | 4 | 4*e* | ..2 | 0 | 0 | 0.2489(2) |
| **Pb2** | 2 | 8*h* | *m*.. | 0.1646(2) | 0.1409(2) | 0 | **Pb21** | 2 | 4*g* | ..*m* | 0.1420(5) | 0.3392(4) | 0 |
| **O2** | -2 | 8*g* | ..2 | 0.1923(3) | 0.6923(3) | ¼ | **Pb22** | 2 | 4*h* | ..*m* | 0.3398(4) | 0.1419(4) | ½ |
| **O1** | -2 | 8*h* | *m*.. | 0.1272(1) | 0.4097(1) | 0 | **O11** | -2 | 4*g* | ..*m* | 0.4015(4) | 0.3756(4) | 0 |
|  |  |  |  |  |  |  | **O12** | -2 | 4*h* | ..*m* | 0.3955(4) | 0.4266(4) | ½ |
|  |  |  |  |  |  |  | **O2** | -2 | 8*i* | 1 | 0.1720(5) | 0.1611(5) | 0.2535(2) |
|  |  |  |  | **x = 0.3** | | | **x = 0.4** | | | **x = 0.5** | | |  |
| **Atom** | **Ox.** | **Wyck.** | **Site** | ***x*** | ***y*** | ***z*** | ***x*** | ***y*** | ***z*** | ***x*** | ***y*** | ***z*** |  |
| **Sn1** | 4 | 4*e* | ..2 | 0 | 0 | 0.2371(2) | 0 | 0 | 0.2432(6) | 0 | 0 | 0.2407(6) |  |
| **Pb1** | 4 | 4*e* | ..*m* | 0 | 0 | 0.2371(2) | 0 | 0 | 0.2432(6) | 0 | 0 | 0.2407(6) |  |
| **Pb21** | 2 | 4*g* | ..*m* | 0.1465(7) | 0.3397(5) | 0 | 0.1446(6) | 0.3382(5) | 0 | 0.1445(7) | 0.3394(6) | 0 |  |
| **Pb22** | 2 | 4*h* | 1 | 0.3352(6) | 0.1429(5) | ½ | 0.3386(6) | 0.1423(4) | ½ | 0.3386(5) | 0.1423(5) | ½ |  |
| **O11** | -2 | 4*g* | ..*m* | 0.3912(4) | 0.3689(4) | 0 | 0.4016(4) | 0.3708(4) | 0 | 0.3904(5) | 0.3772(6) | 0 |  |
| **O12** | -2 | 4*h* | ..2 | 0.3799(4) | 0.4589(4) | ½ | 0.4030(4) | 0.4470(4) | ½ | 0.3897(5) | 0.4290(5) | ½ |  |
| **O2** | -2 | 8*i* | ..*m* | 0.2071(4) | 0.1832(4) | 0.2412(6) | 0.1832(5) | 0.1712(4) | 0.2550(8) | 0.1859(3) | 0.1573(3) | 0.2605(5) |  |
|  |  |  |  | **x = 0.6** | | | **x = 0.7** | | | **x = 0.8** | | |  |
| **Atom** | **Ox.** | **Wyck.** | **Site** | ***x*** | ***y*** | ***z*** | ***x*** | ***y*** | ***z*** | ***x*** | ***y*** | ***z*** |  |
| **Sn1** | 4 | 4*e* | ..2 | 0 | 0 | 0.2408(7) | 0 | 0 | 0.2392(7) | 0 | 0 | 0.2420(7) |  |
| **Pb1** | 4 | 4*e* | ..*m* | 0 | 0 | 0.2408(7) | 0 | 0 | 0.2392(7) | 0 | 0 | 0.2420(7) |  |
| **Pb21** | 2 | 4*g* | ..*m* | 0.1435(6) | 0.3409(6) | 0 | 0.1419(6) | 0.3405(7) | 0 | 0.1421(6) | 0.3410(6) | 0 |  |
| **Pb22** | 2 | 4*h* | 1 | 0.3384(5) | 0.1430(5) | ½ | 0.3387(6) | 0.1430(5) | ½ | 0.3379(5) | 0.1416(5) | ½ |  |
| **O11** | -2 | 4*g* | ..*m* | 0.4016(6) | 0.3778(6) | 0 | 0.4015(7) | 0.3704(7) | 0 | 0.4084(5) | 0.3715(5) | 0 |  |
| **O12** | -2 | 4*h* | ..2 | 0.3864(5) | 0.4170(5) | ½ | 0.3853(5) | 0.4110(6) | ½ | 0.3853(4) | 0.4110(5) | ½ |  |
| **O2** | -2 | 8*i* | ..*m* | 0.1931(2) | 0.1557(2) | 0.2546(5) | 0.1876(2) | 0.1530(3) | 0.2612(5) | 0.1726(4) | 0.1594(4) | 0.2584(6) |  |
|  |  |  |  | **x = 0.9** | | |  |  |  |  |  |  |  |
| **Atom** | **Ox.** | **Wyck.** | **Site** | ***x*** | ***y*** | ***z*** |  |  |  |  |  |  |  |
| **Sn1** | 4 | 4*e* | ..2 | 0 | 0 | 0.2426(8) |  |  |  |  |  |  |  |
| **Pb1** | 4 | 4*e* | ..*m* | 0 | 0 | 0.2426(8) |  |  |  |  |  |  |  |
| **Pb21** | 2 | 4*g* | ..*m* | 0.1426(7) | 0.3418(7) | 0 |  |  |  |  |  |  |  |
| **Pb22** | 2 | 4*h* | 1 | 0.3375(6) | 0.1407(6) | ½ |  |  |  |  |  |  |  |
| **O11** | -2 | 4*g* | ..*m* | 0.4097(4) | 0.3761(6) | 0 |  |  |  |  |  |  |  |
| **O12** | -2 | 4*h* | ..2 | 0.3823(5) | 0.4076(5) | ½ |  |  |  |  |  |  |  |
| **O2** | -2 | 8*i* | ..*m* | 0.1713(4) | 0.1571(4) | 0.2584(7) |  |  |  |  |  |  |  |

**Table S3**: Irreducible representations for the non-equivalent atomic sites of Pb3O4 compounds in two different space groups.

| Space group : *P*42*/mbc* | | | Space group: *Pbam* | | |
| --- | --- | --- | --- | --- | --- |
| Atom | Wyckoff | Irreducible Rep. | Atom | Wyckoff | Irreducible Rep. |
| Pb1 | 4*d* | B1g + 2Eg + A2u + 2Eu | Pb1 | 4*f* | Ag + B1g + 2B2g + 2B3g + B1u + 2B2u + 2B3u |
| Pb2 | 8*h* | 2A1g + 2B1g + 2B2g +  A2u + 4Eu | Pb21 | 4*g* | 2Ag + 2B1g + B2g + B3g + B1u + 2B2u + 2B3u |
| O2 | 8*g* | A1g + 2B1g + B2g + 3Eg + 2A2u + 3Eu | Pb22 | 4*h* | 2Ag + 2B1g + B2g + B3g + B1u + 2B2u + 2B3u |
| O1 | 8*h* | 2A1g + 2B1g + 2B2g +  A2u + 4Eu | O2 | 8*i* | 3Ag + 3B1g + 3B2g + 3B3g + 3B1u + 3B2u + 3B3u |
|  | | | O11 | 4*g* | 2Ag + 2B1g + B2g + B3g +  B1u + 2B2u + 2B3u |
|  | | | O12 | 4*h* | 2Ag + 2B1g + B2g + B3g +  B1u + 2B2u + 2B3u |
| Raman: 5A1g + 7B1g + 5B2g + 9Eg  IR: 4A2u + 12Eu  acoustic: A2u + Eu | | | Raman: 12Ag + 12B1g + 9B2g + 9B3g  IR: 7B1u + 12B2u + 12B3u  acoustic: 7B1u + 12B2u + 12B3u  silent: 8Au | | |


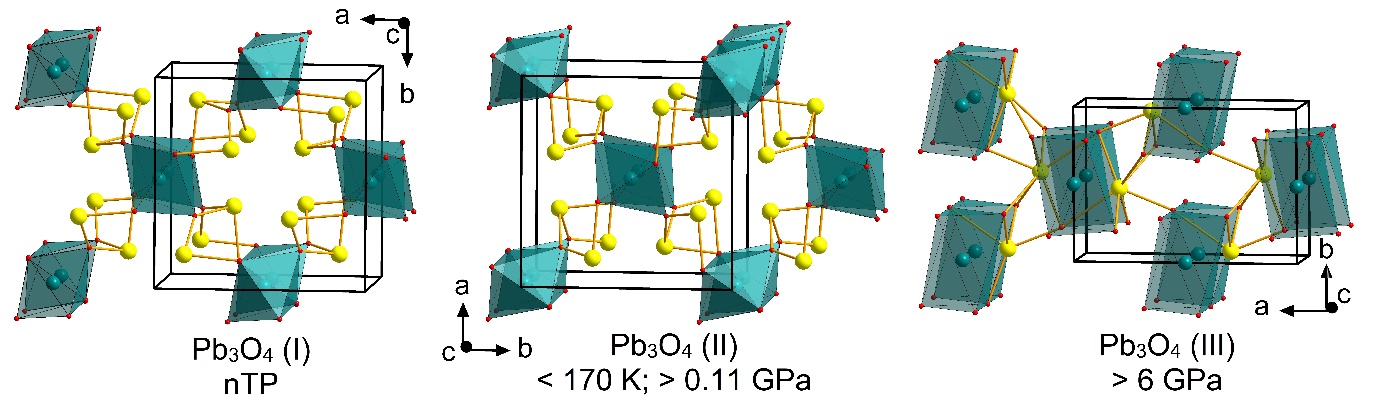


**Figure S1:** Crystal structures ofPb3O4 at ambient conditions (nTP), at low temperatures or increased pressure (phase II), and at high pressure (phase III), showing the change of the Pb4+O6 octahedra and their connectivity to Pb2+O4.


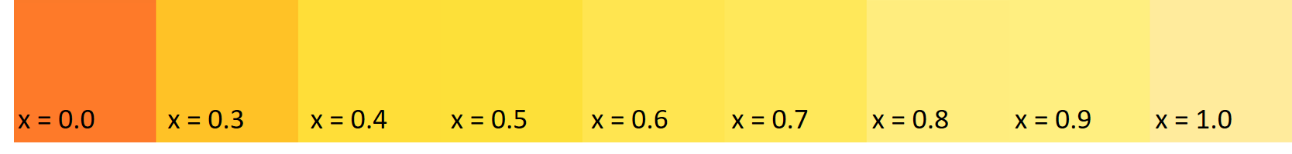


**Figure S2:** Changes of colors with respect to the compositional x in Pb2(Pb1-xSnx)O4 compounds. Each square block refers to digital photograph of the respective sample surface.


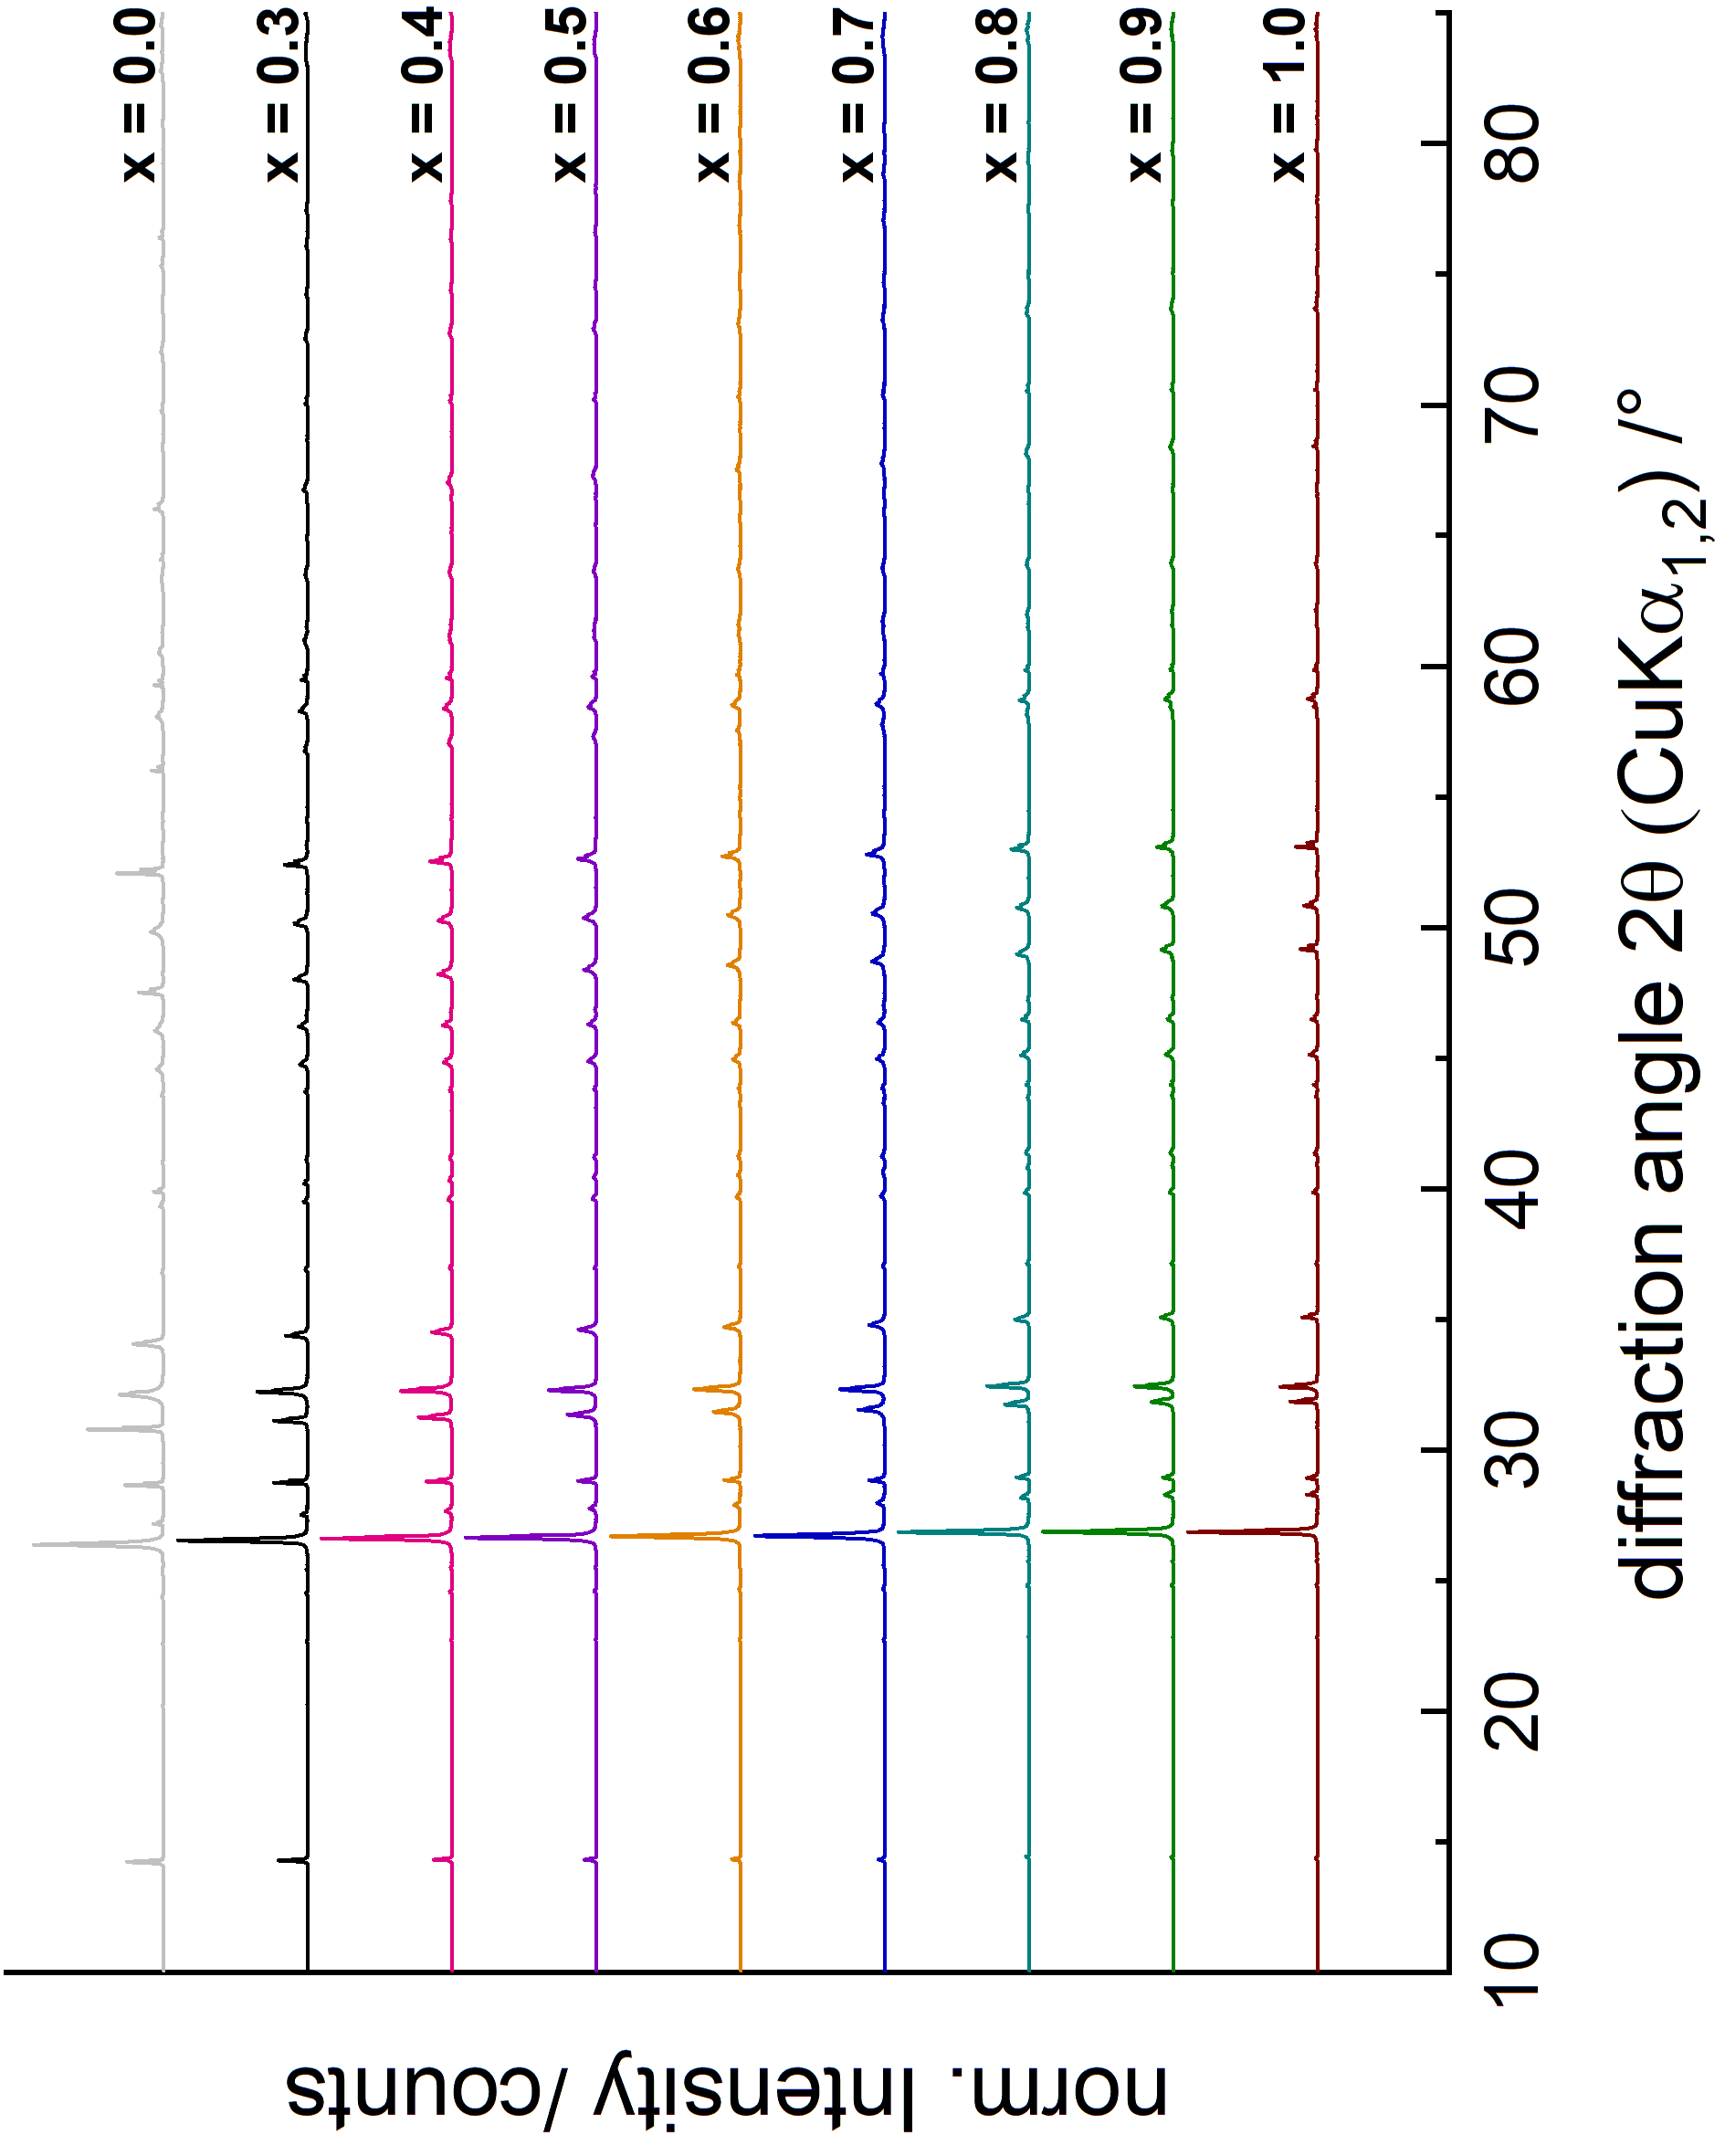


**Figure S3:** Stack plots of the X-ray powder diffraction patterns (normalized to *211* reflection at around 26 – 27 2) of the Pb2(Pb1-xSnx)O4 compounds.


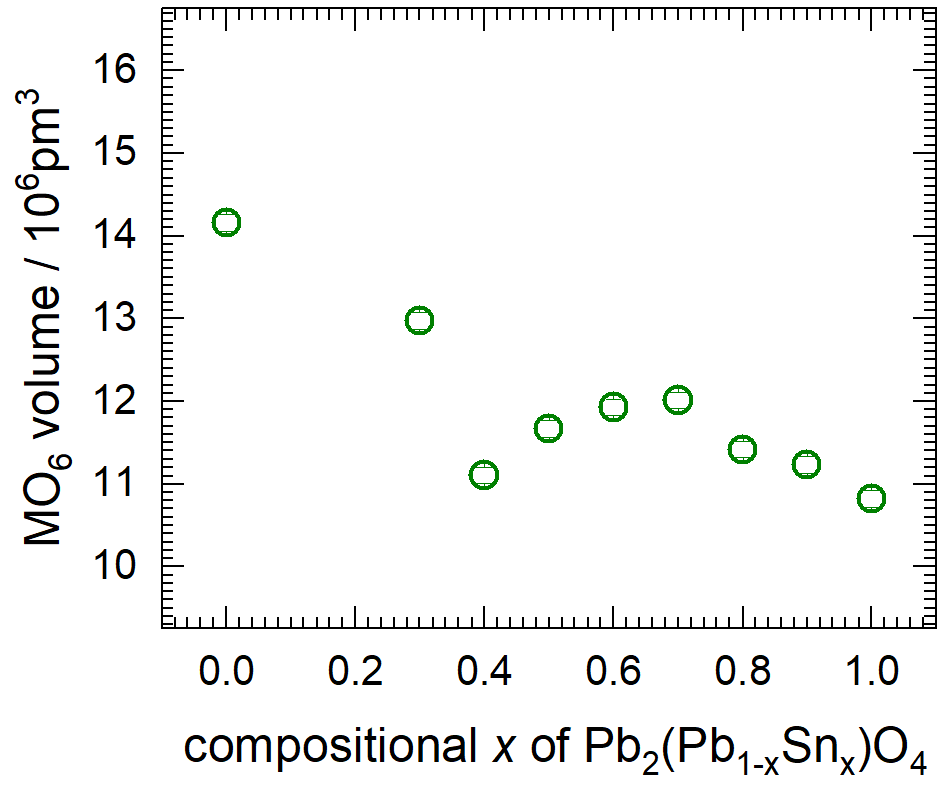


**Figure S4:** Change of the MO6 octahedral volume in Pb2(Pb1-xSnx)O4 with respect to compositional x.


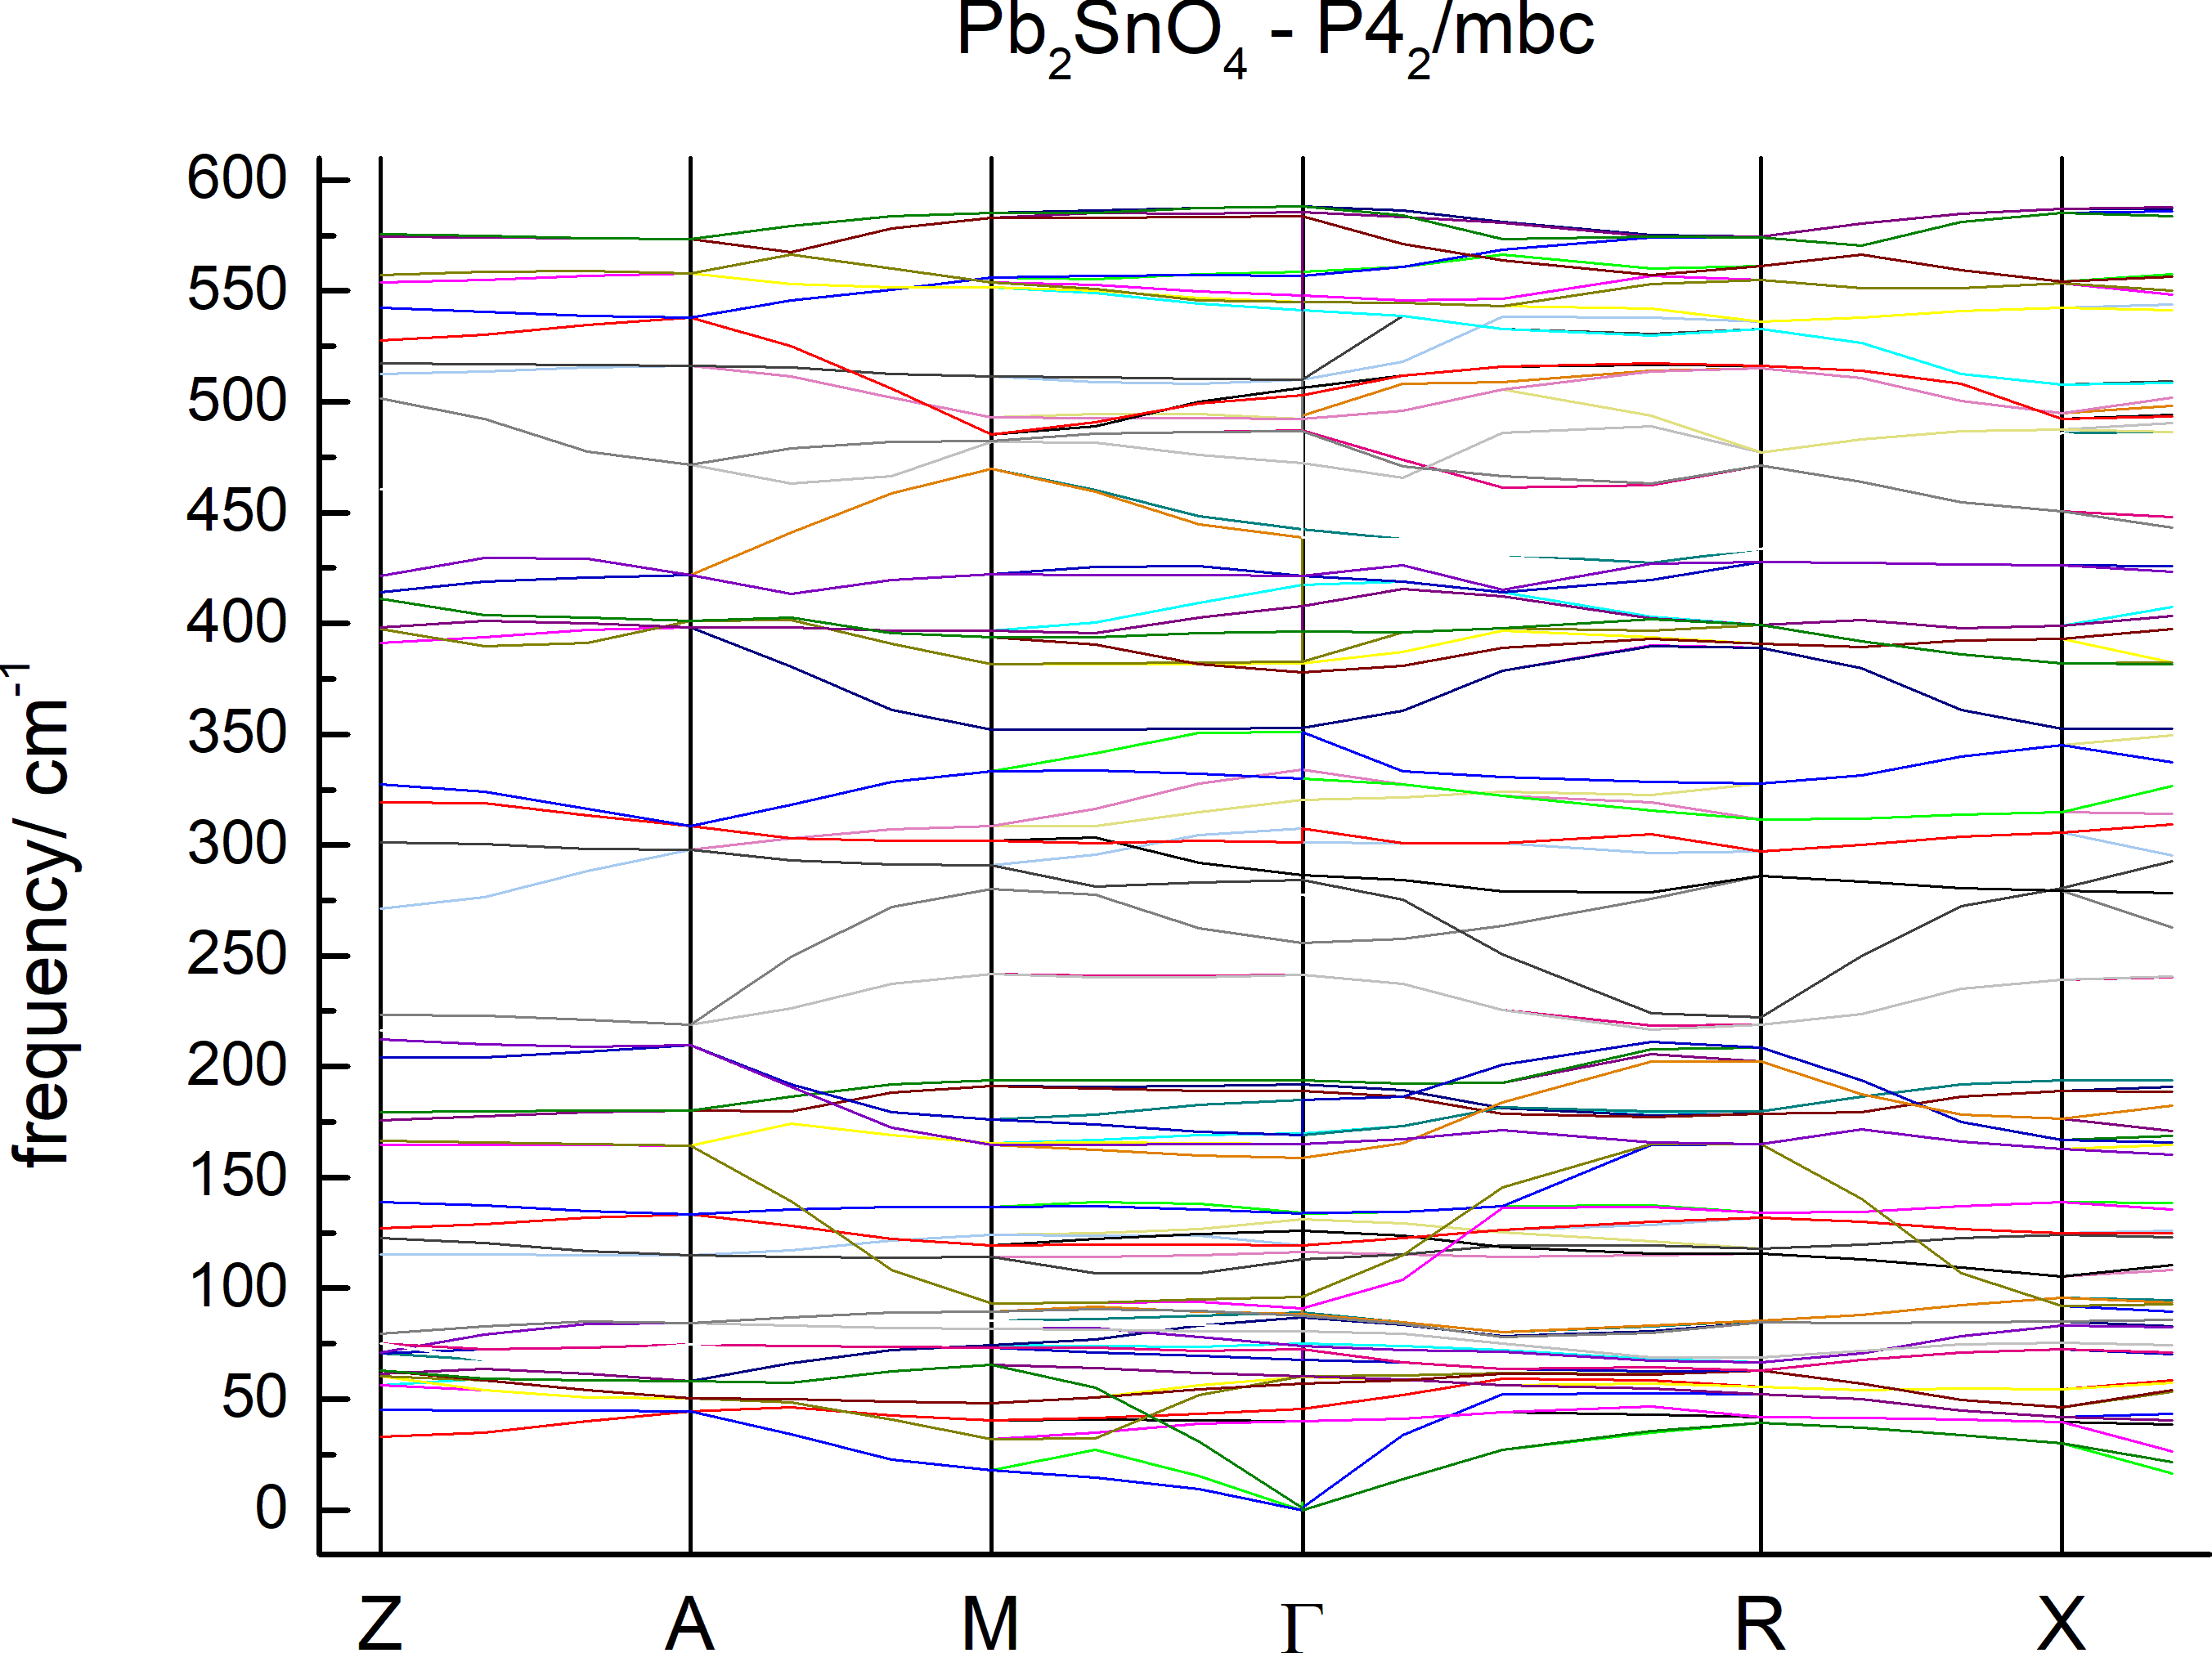


**Figure S5:** Phonon dispersions of tetragonal (*P*42*/mbc*) Pb2SnO4 in some high symmetry directions.


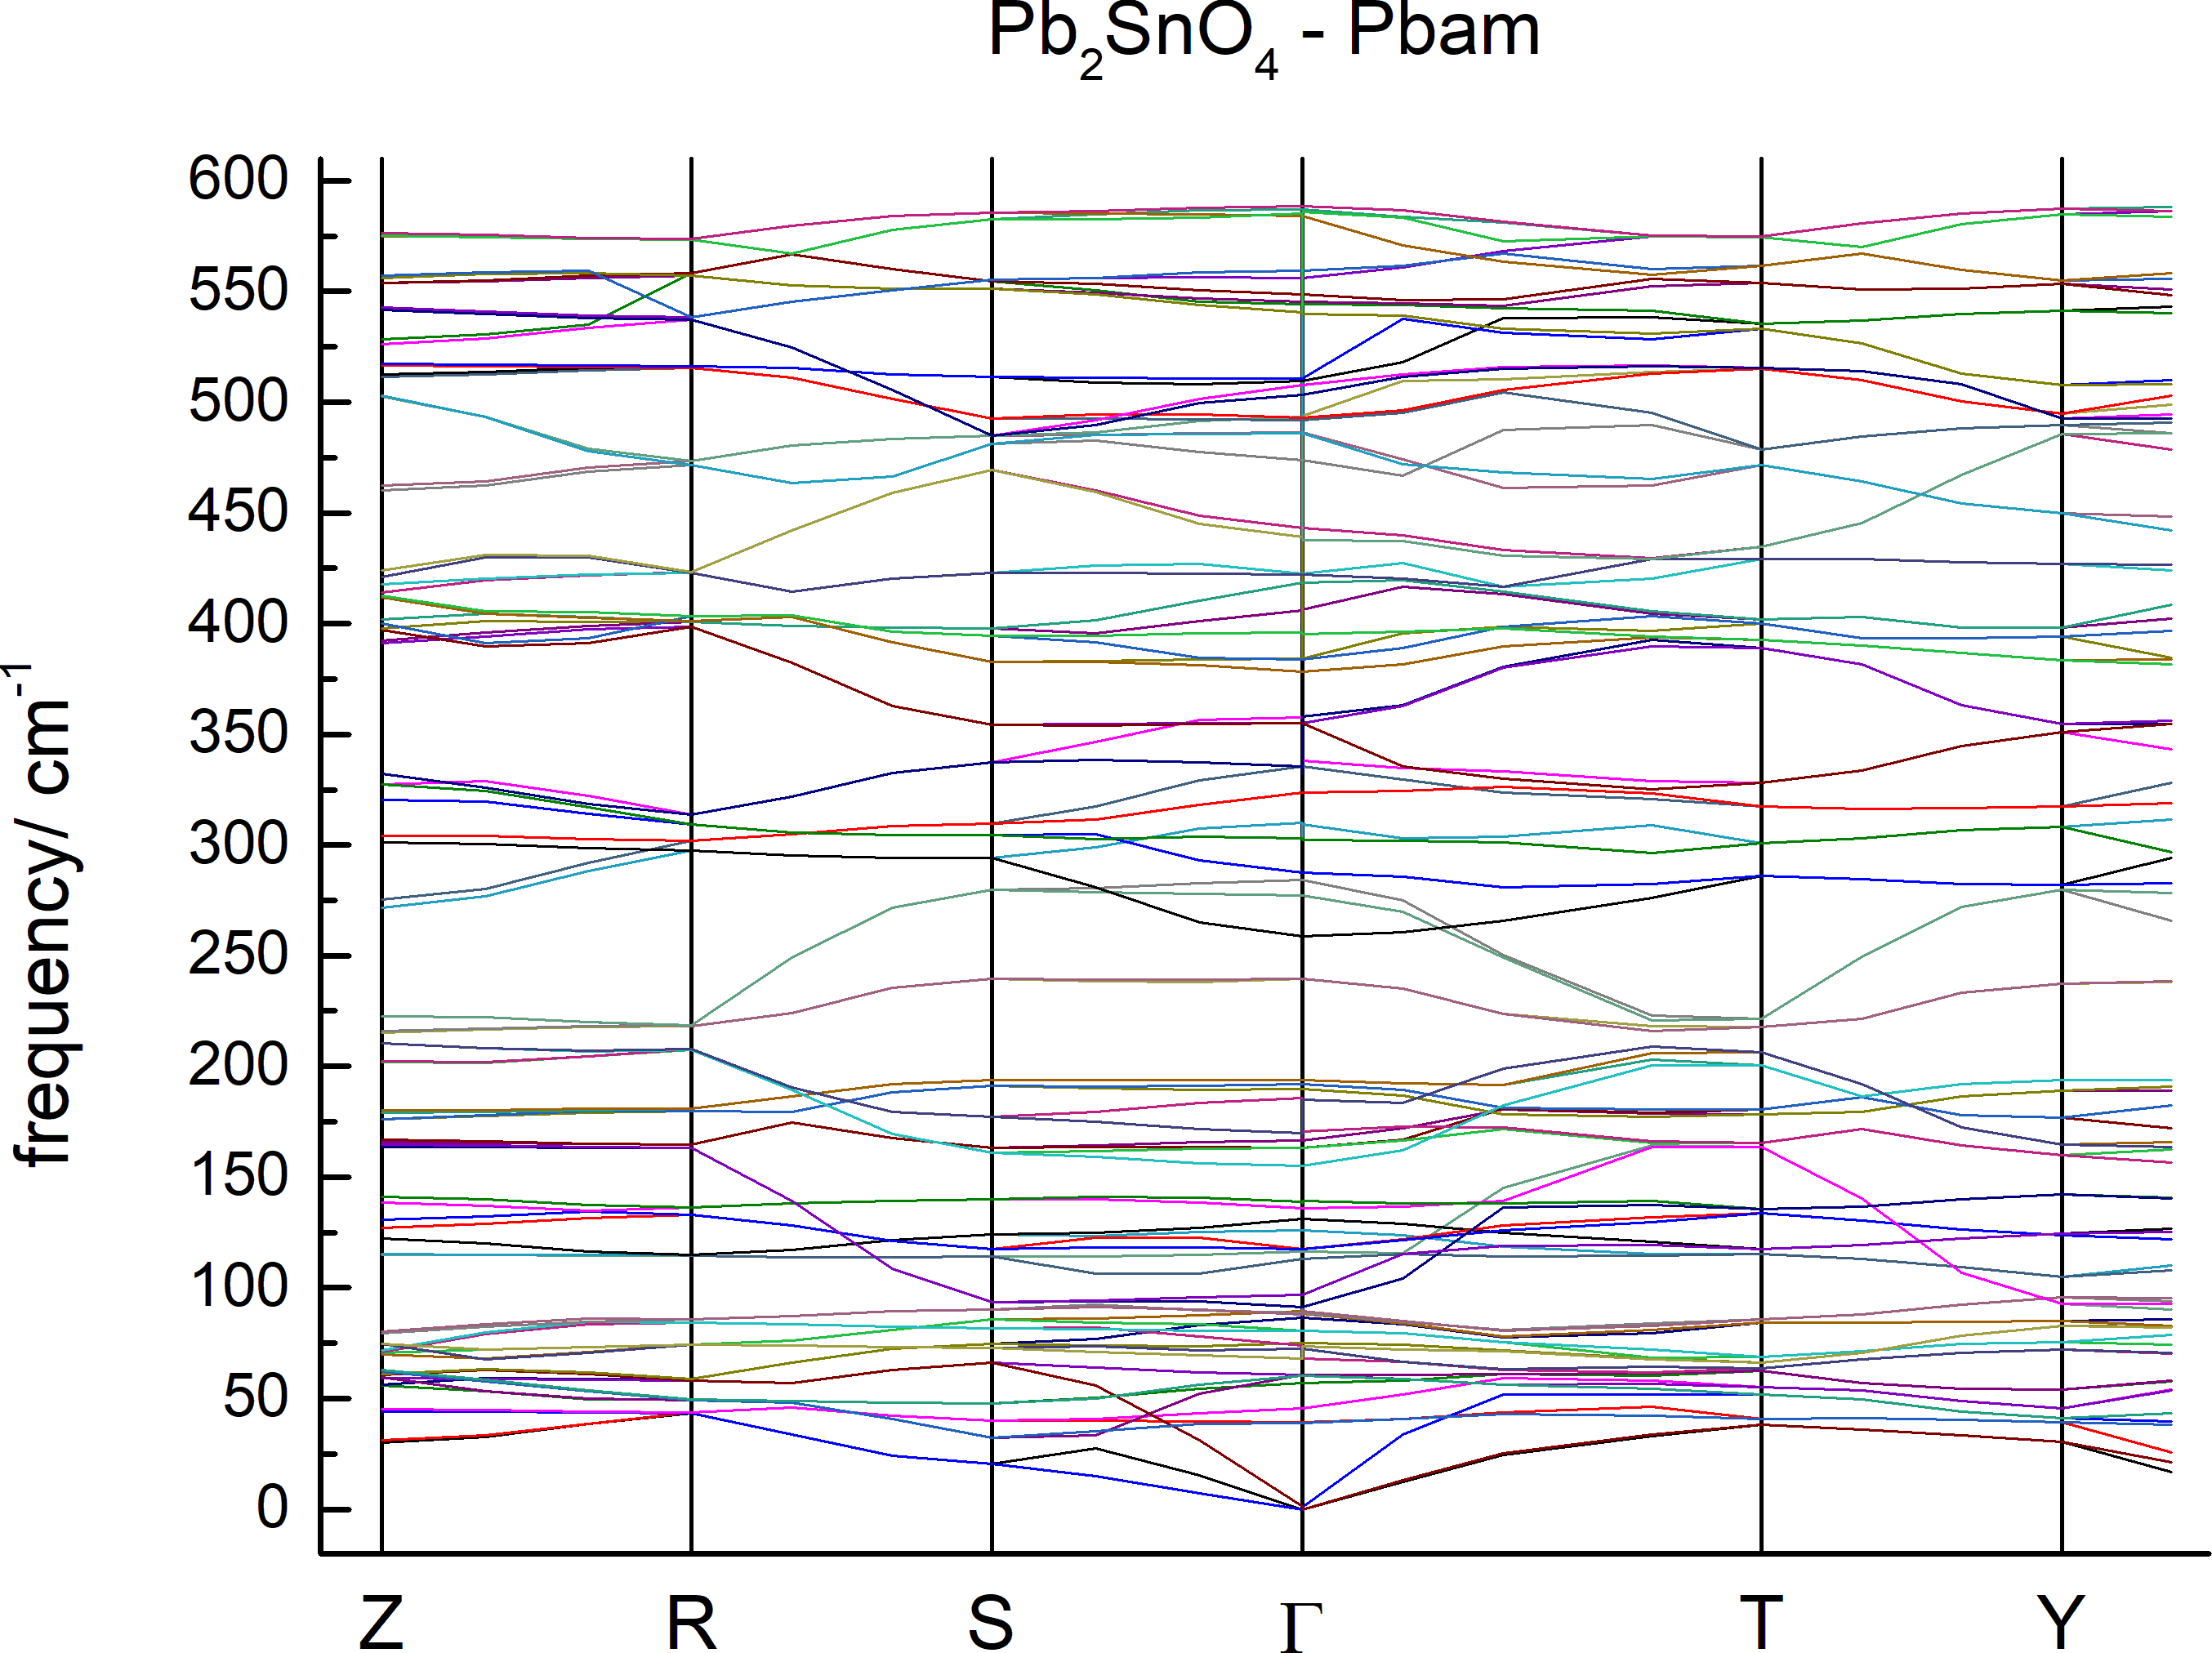


**Figure S6:** Phonon dispersions of orthorhombic (*Pbam*) Pb2SnO4 in some high symmetry directions.


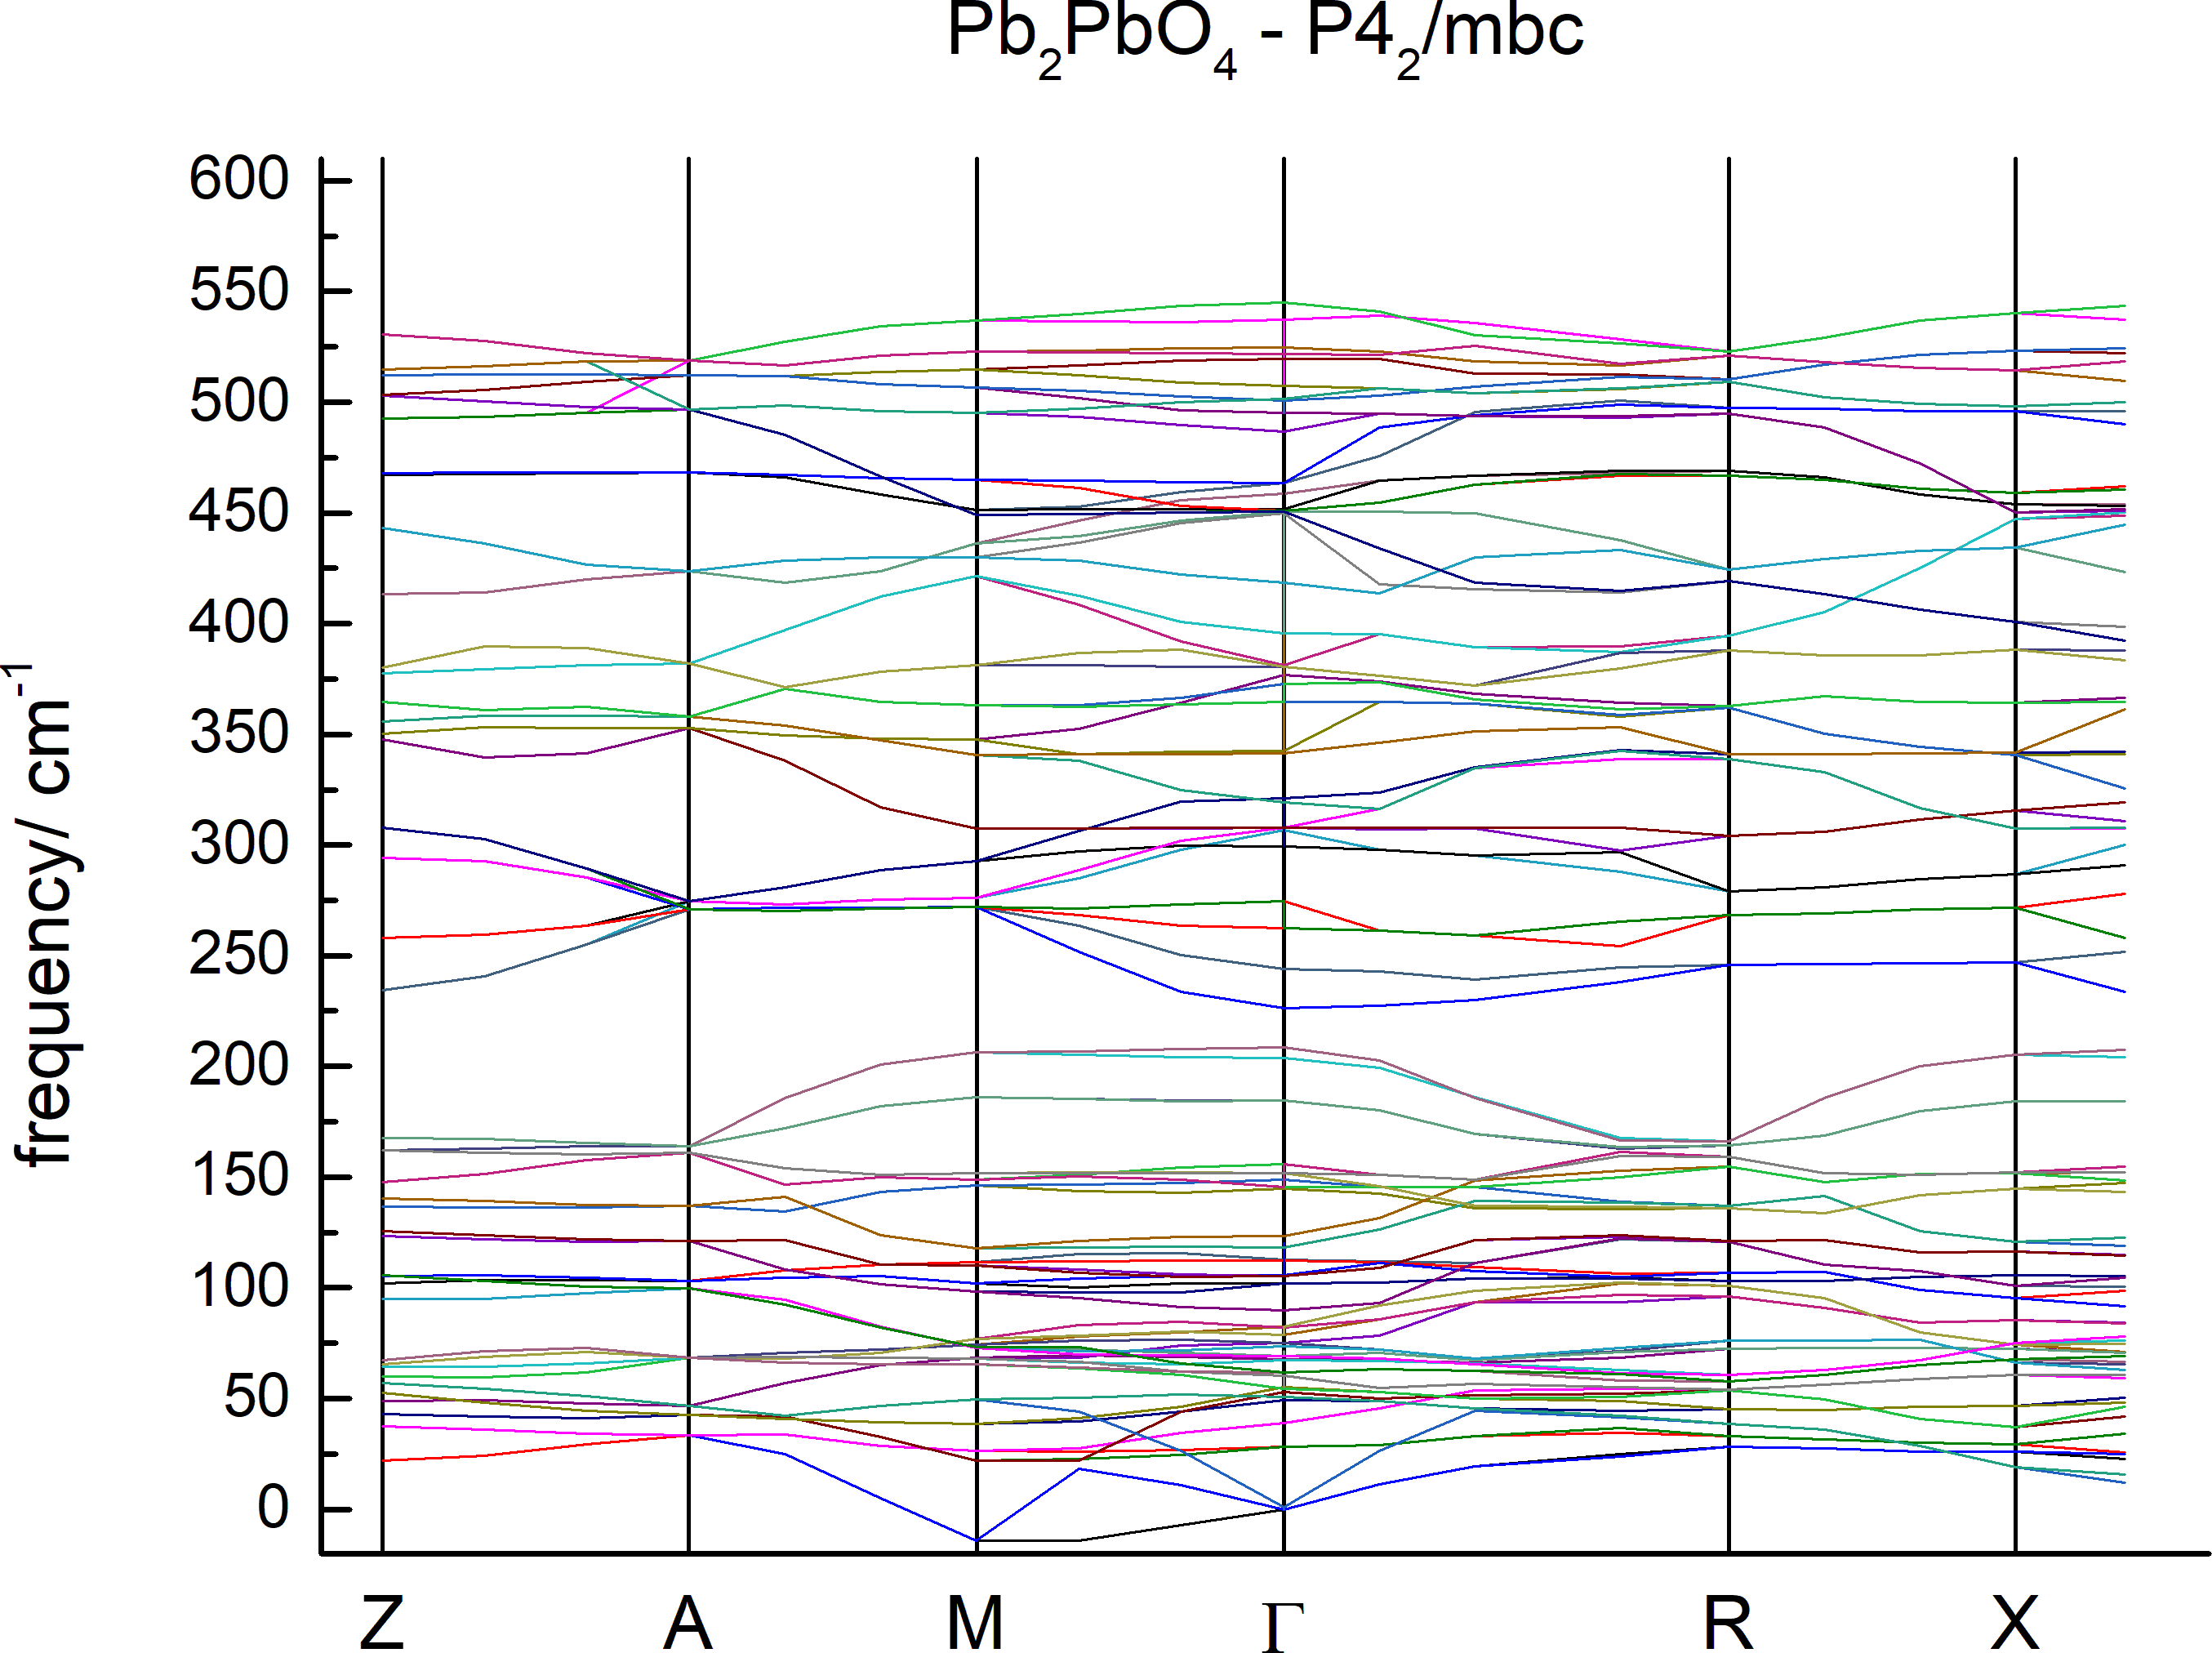


**Figure S7:** Phonon dispersions of tetragonal (*P*42*/mbc*) Pb2PbO4 in some high symmetry directions.


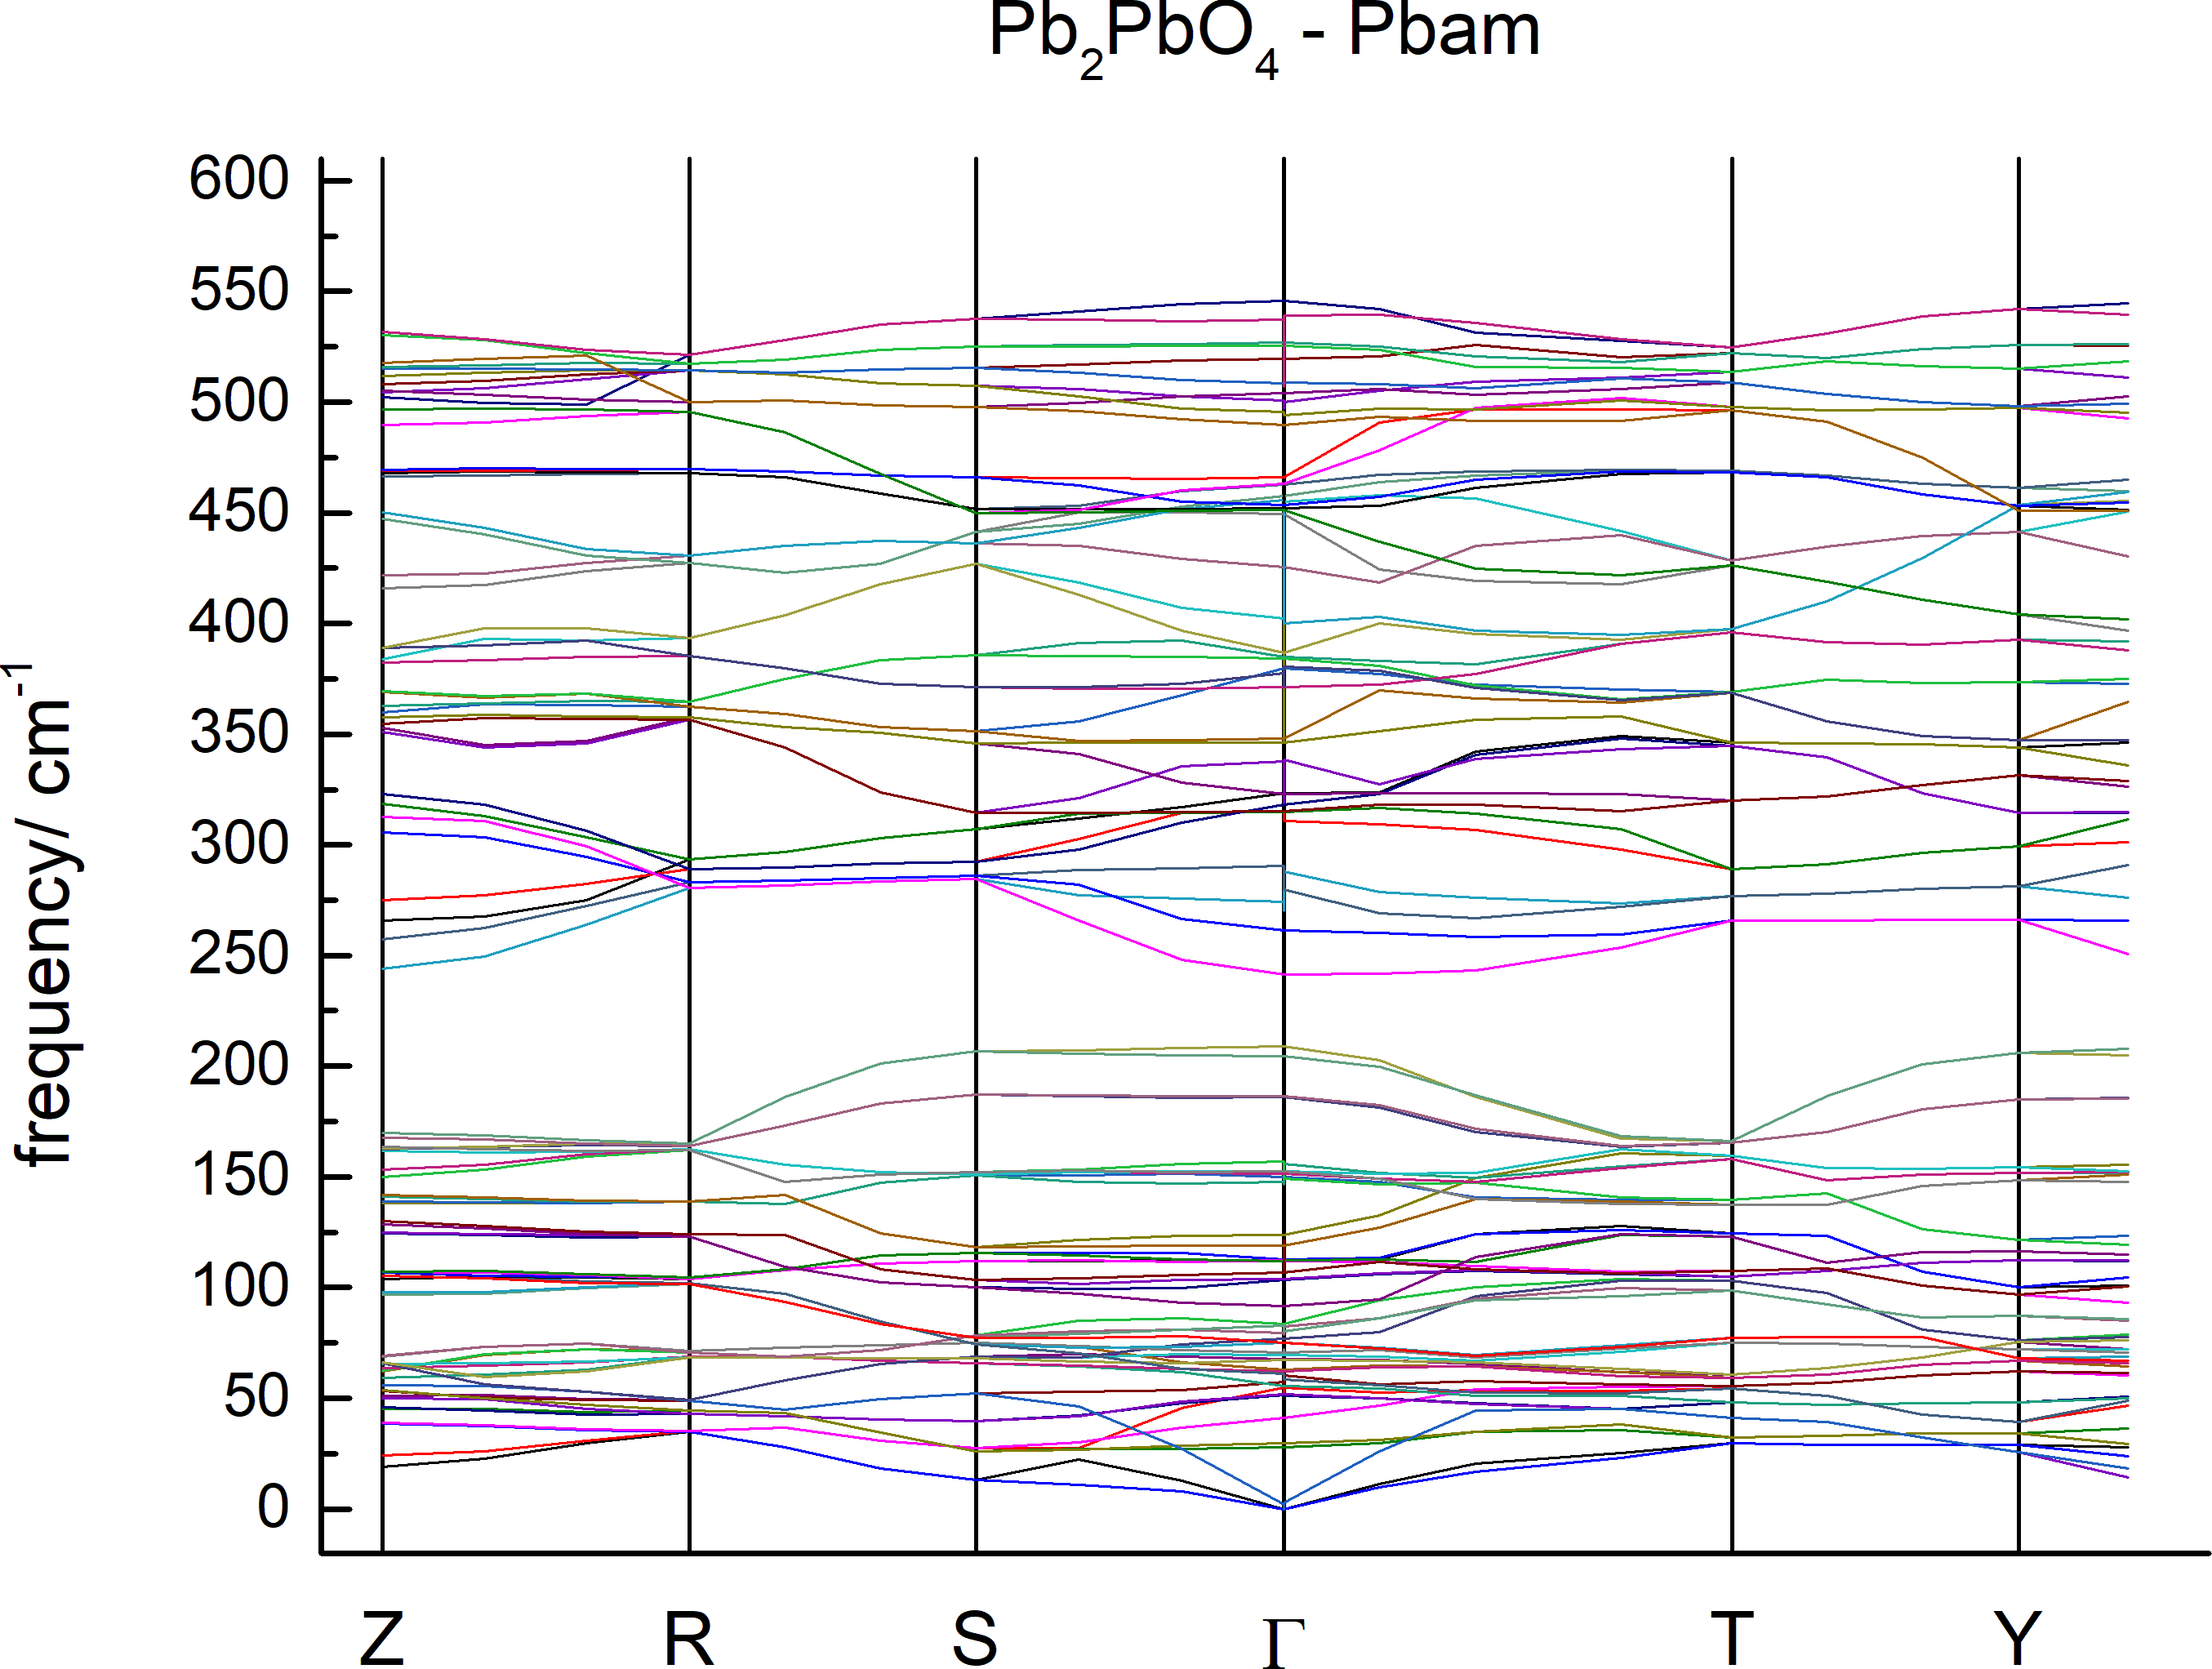


**Figure S8:** Phonon dispersions of orthorhombic (*Pbam*) Pb2PbO4 in some high symmetry directions.

**
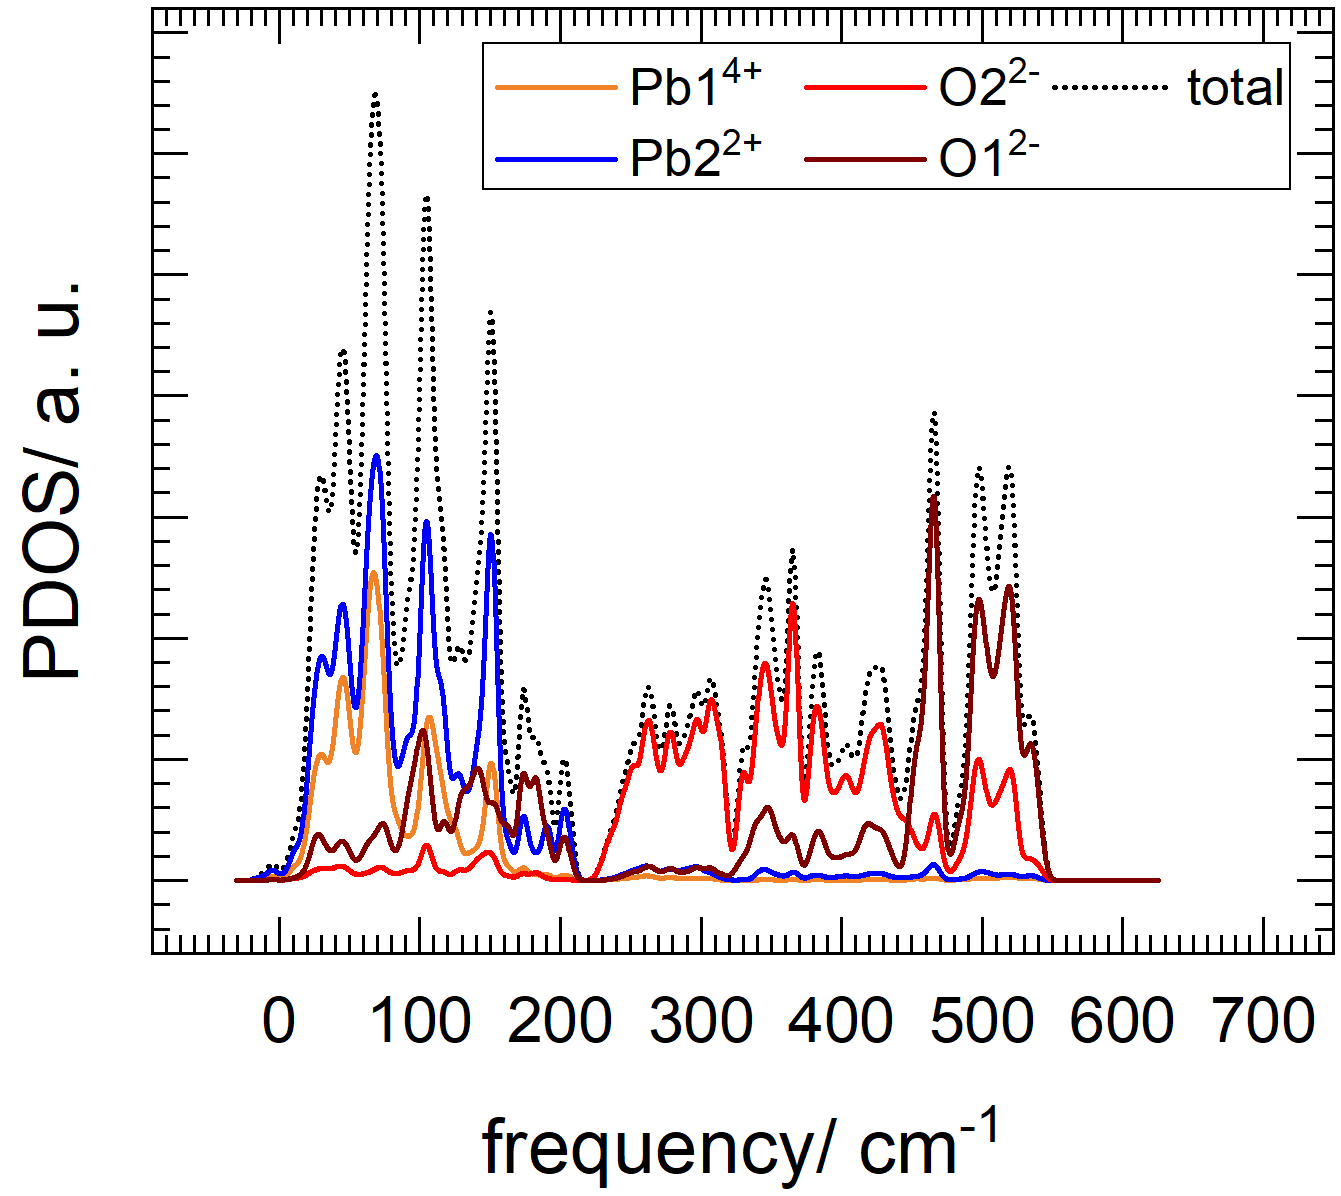
**

**Figure S9:** PDOS of tetragonal Pb2PbO4 (space group *P*42/*mbc*).


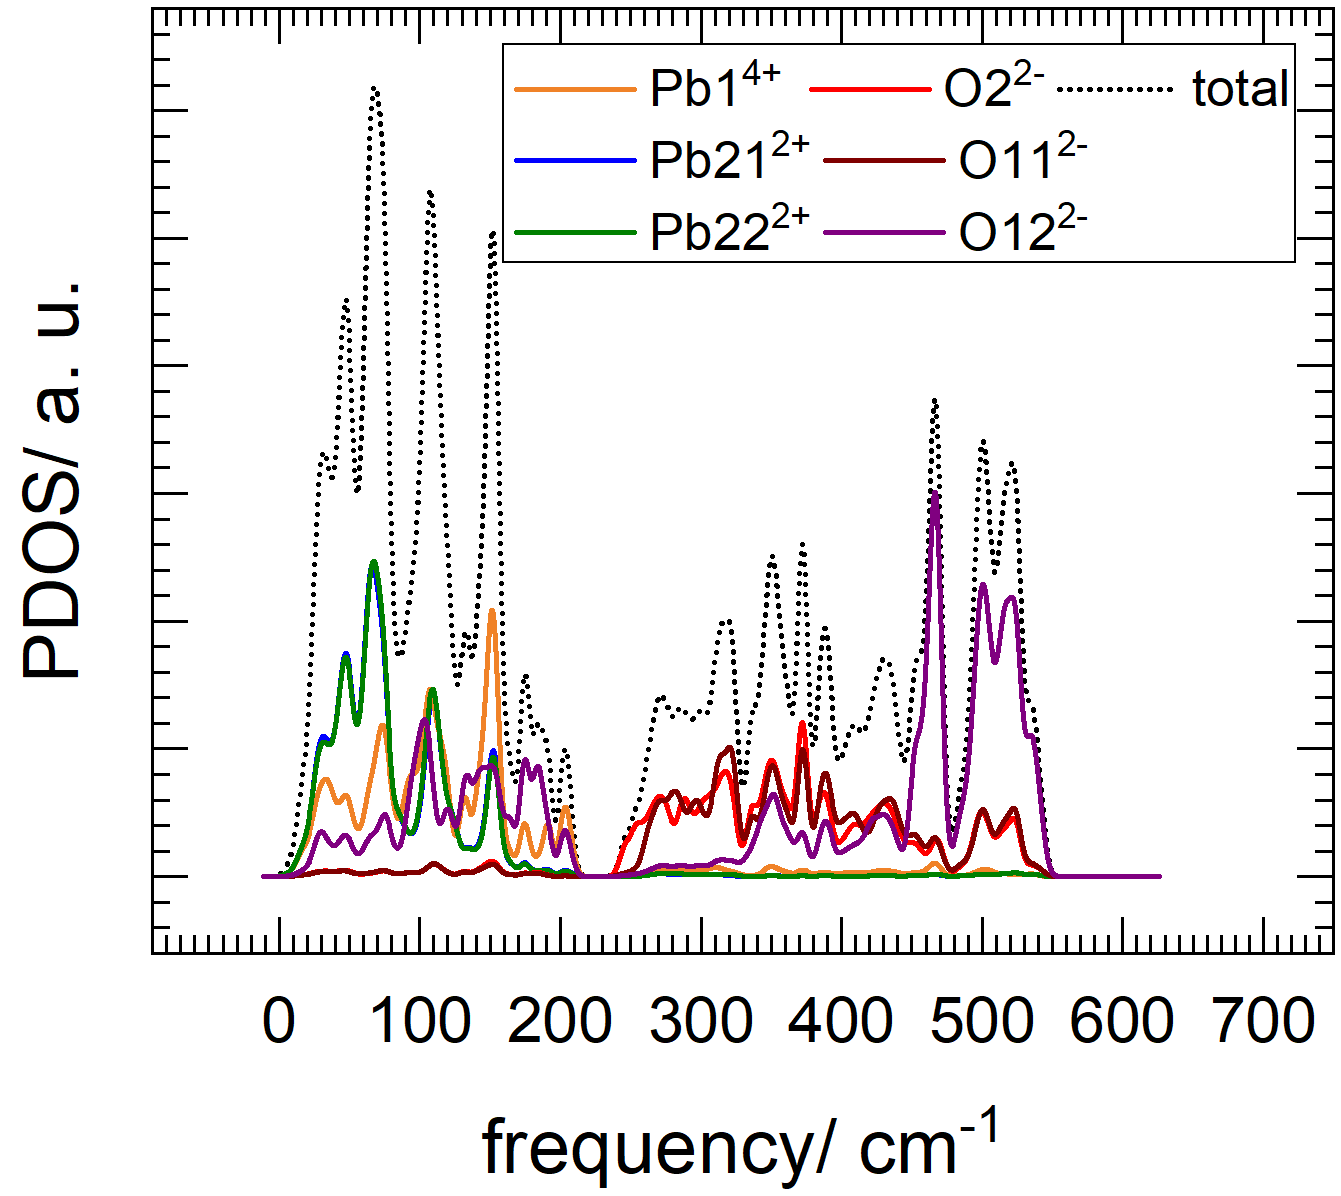


**Figure S10:** PDOS of orthorhombic Pb2PbO4 (space group *Pbam*).


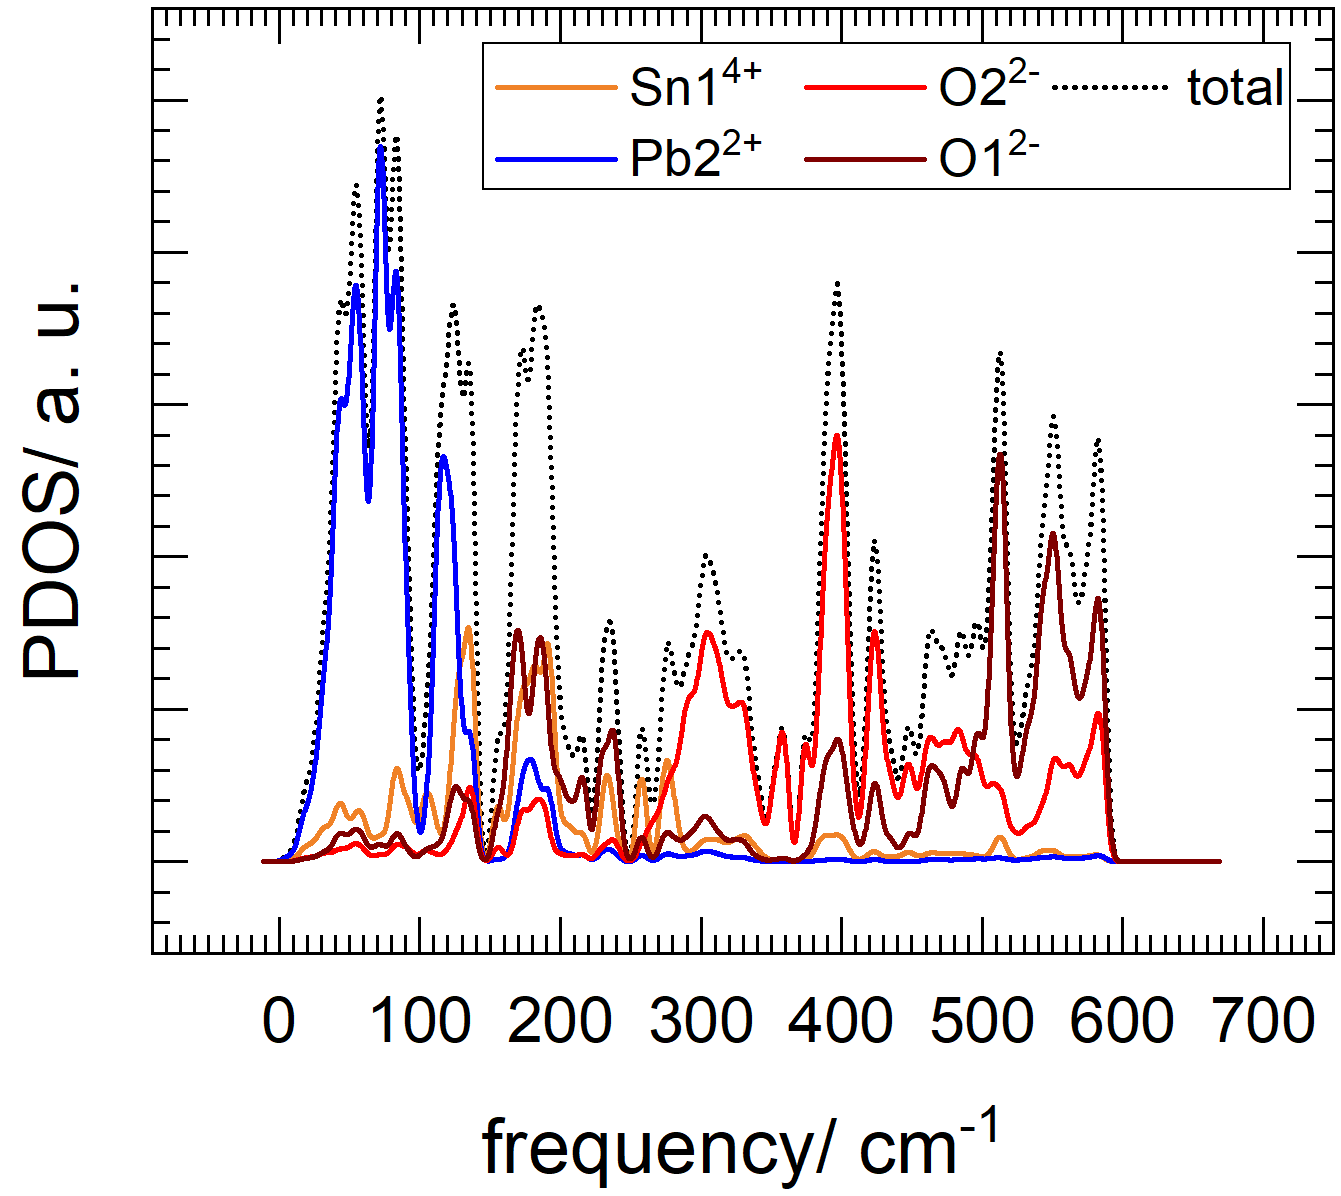


**Figure S11:** PDOS of tetragonal Pb2SnO4 (space group *P*42/*mbc*).

*
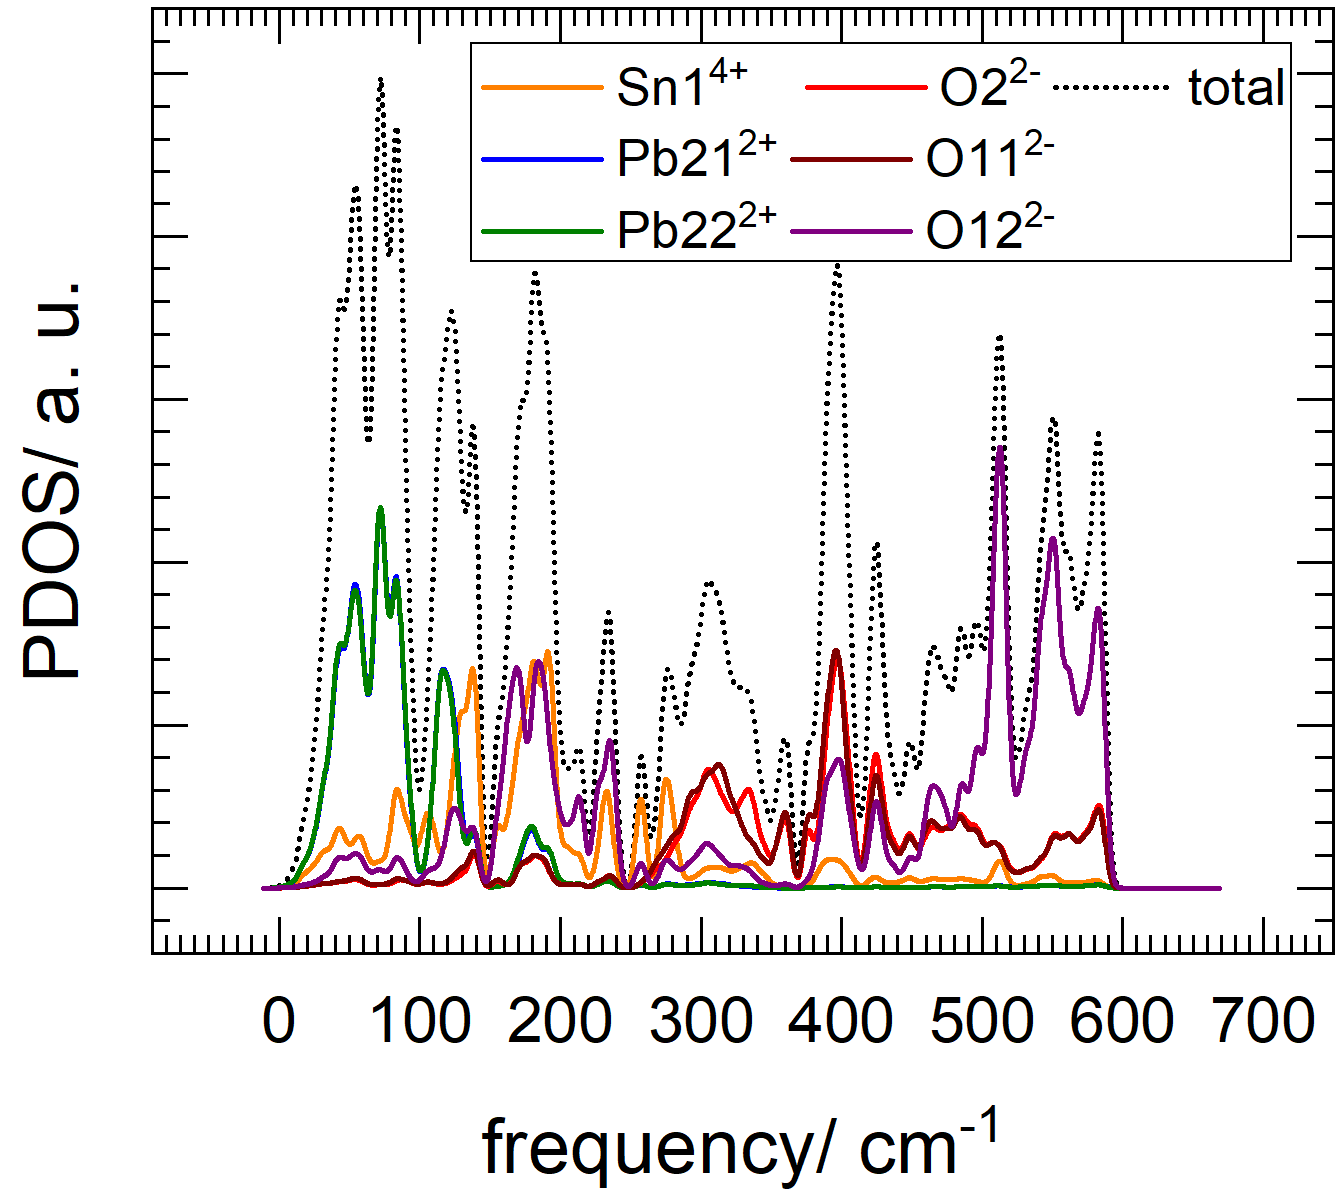
*

**Figure S12:** PDOS of orthorhombic Pb2SnO4 (space group *Pbam*).


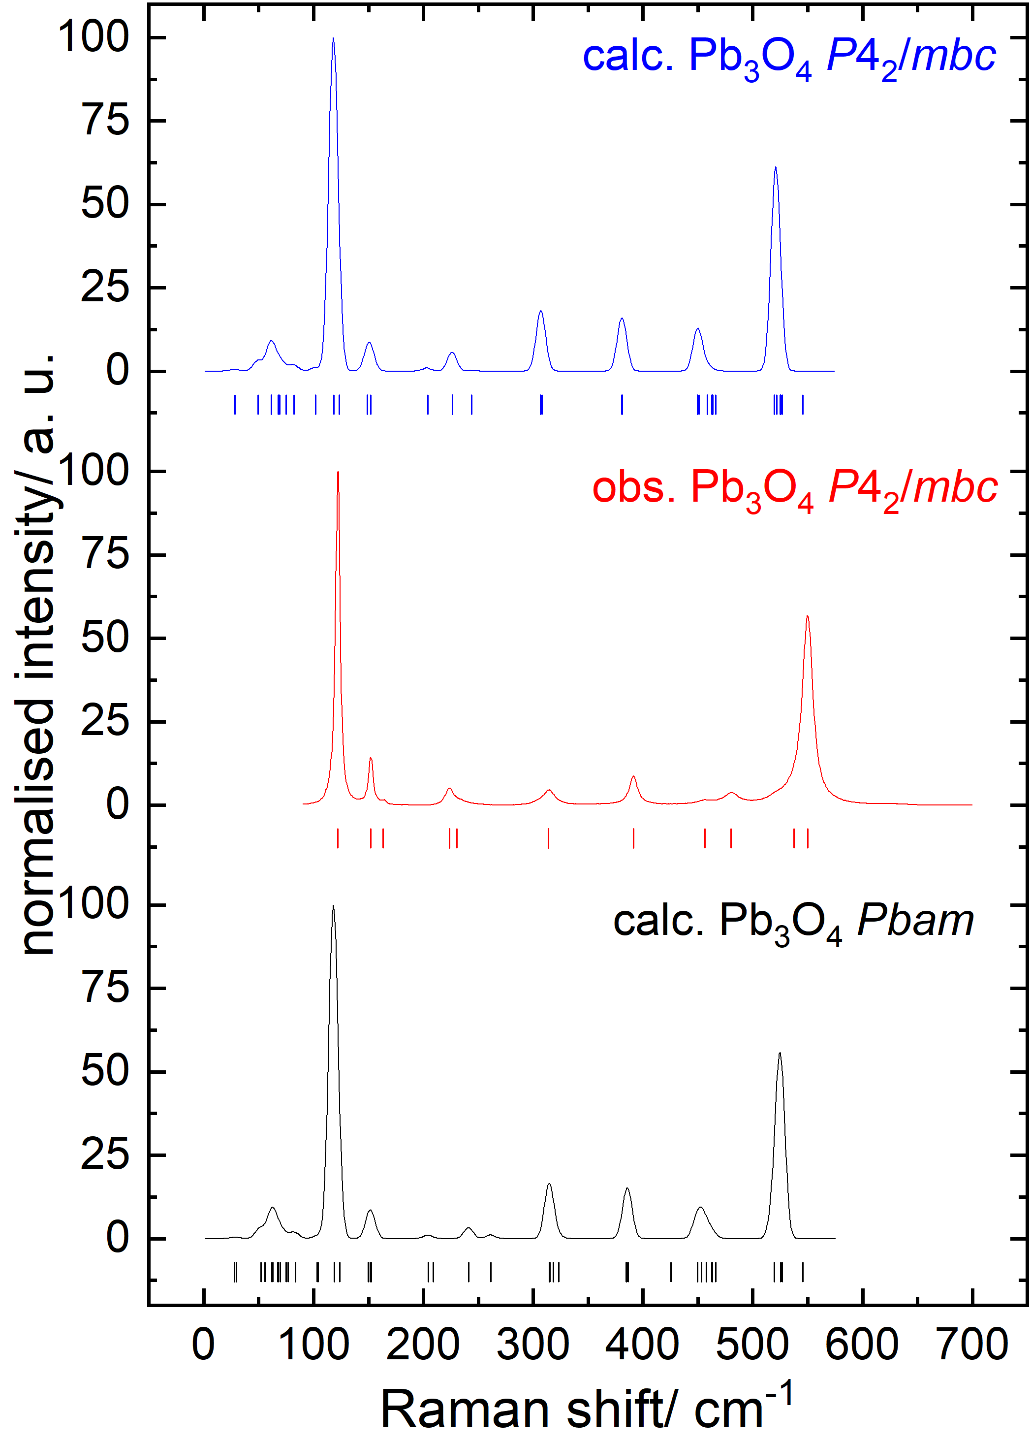


**Figure S13:** DFT calculated and observed Raman spectra for Pb2PbO4. The vertical bars elsewhere show the fitted peak positions.


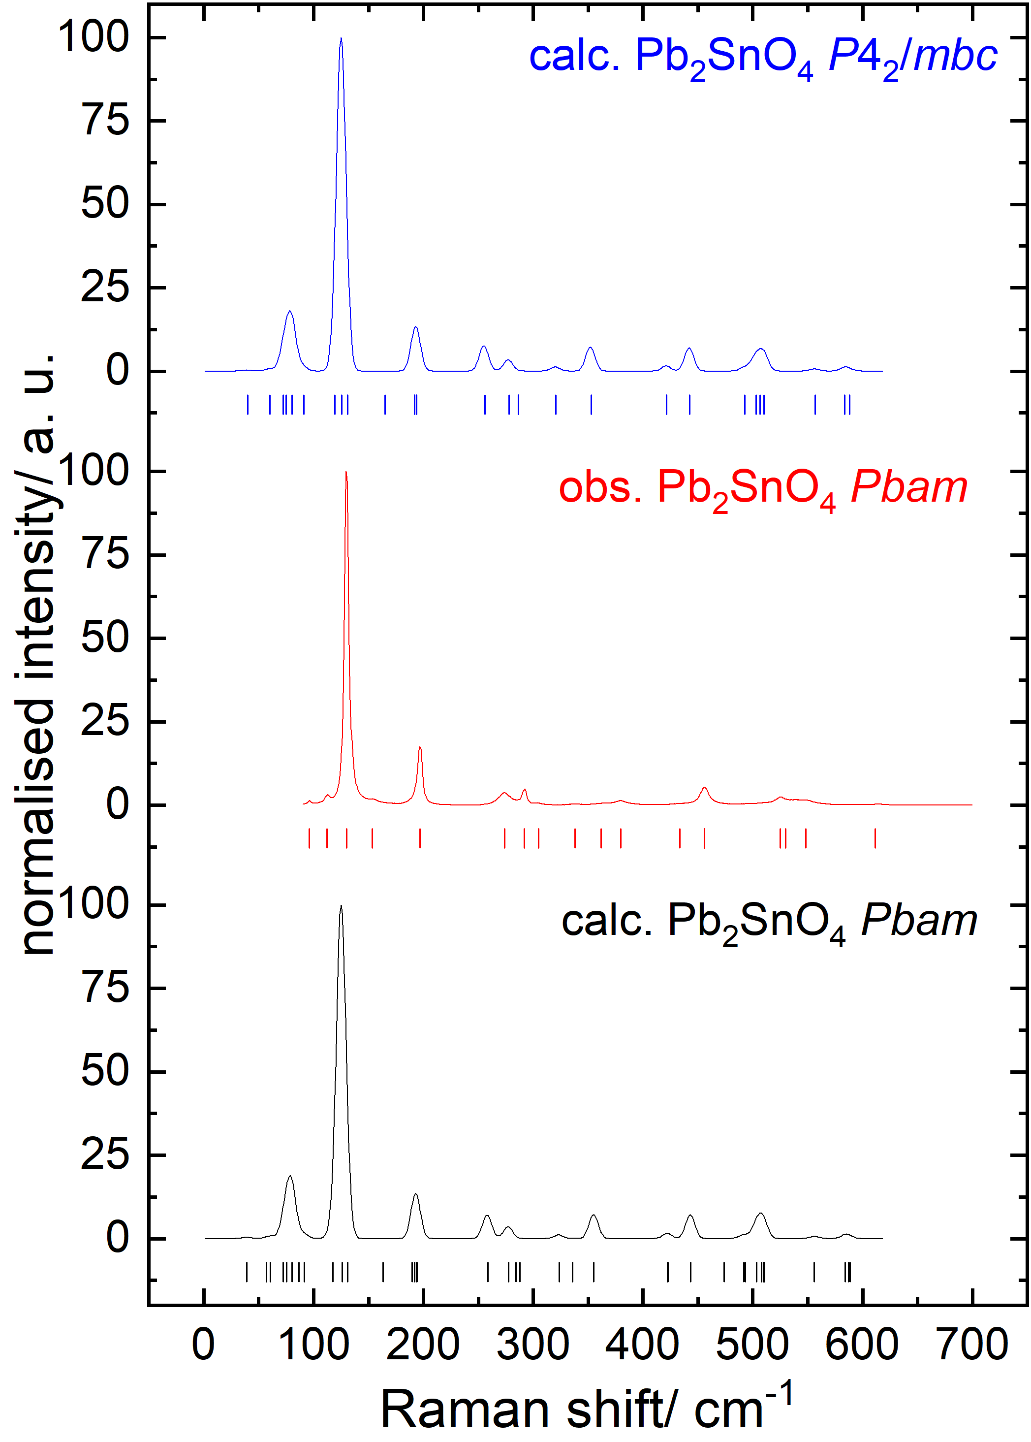


**Figure S14:** DFT calculated and observed Raman spectra for Pb2SnO4. The vertical bars elsewhere show the fitted peak positions.


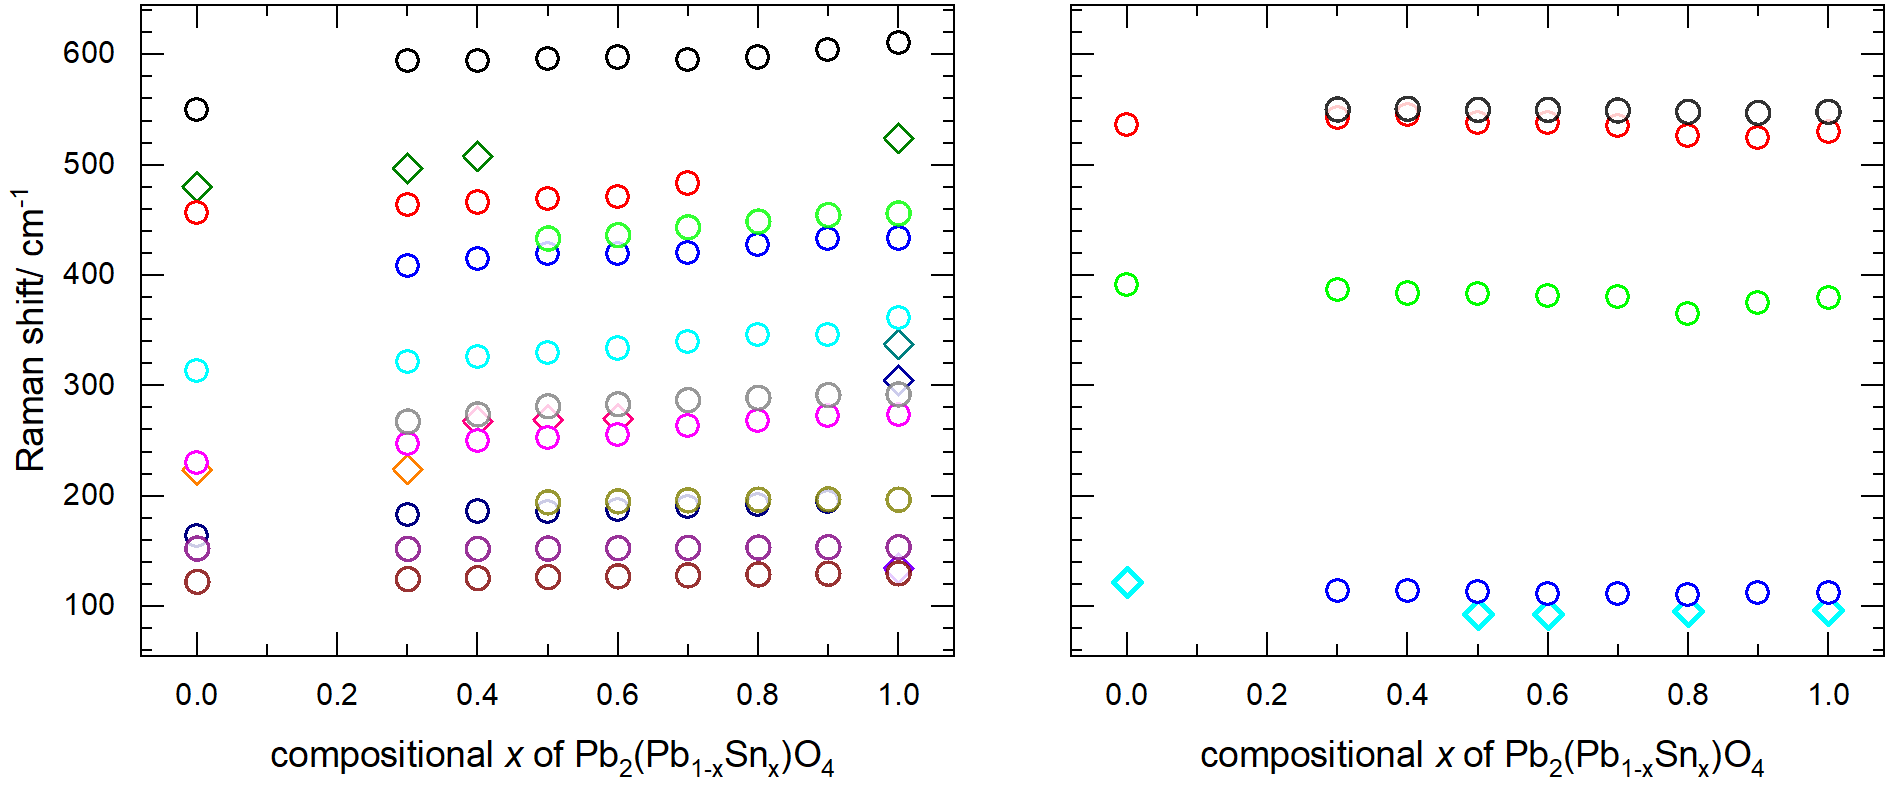


**Figure S15:** Hardening (left) and softening (right) of the Raman peak maxima of the Pb2(Pb1-xSnx)O4 compounds.


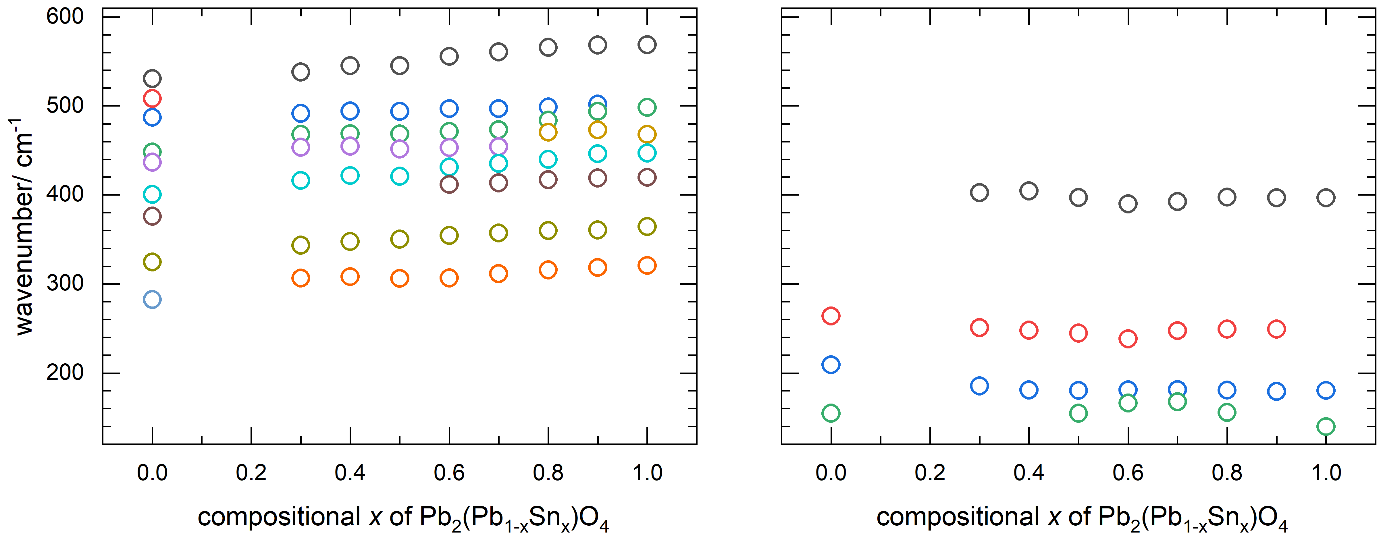


**Figure S16:** Hardening (left) and softening (right) of the FTIR peak maxima of the Pb2(Pb1-xSnx)O4 compounds.


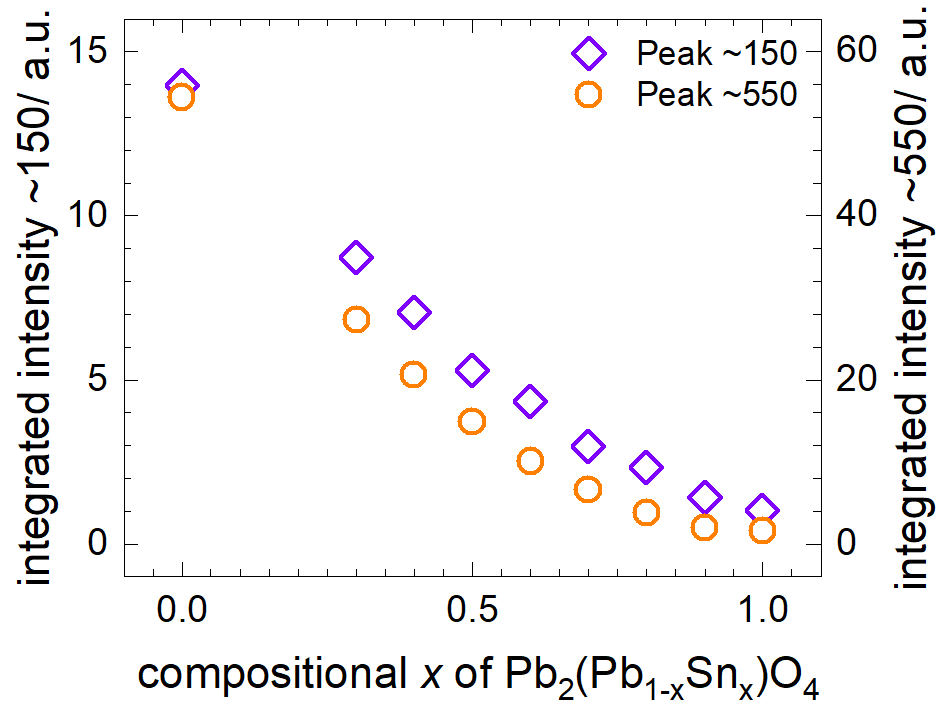


**Figure S17:** Change of the integrated intensity of the peaks measured around ~150 cm-1 and ~550 cm-1 in Pb2(Pb1-xSnx)O4 with respect to compositional x.

**
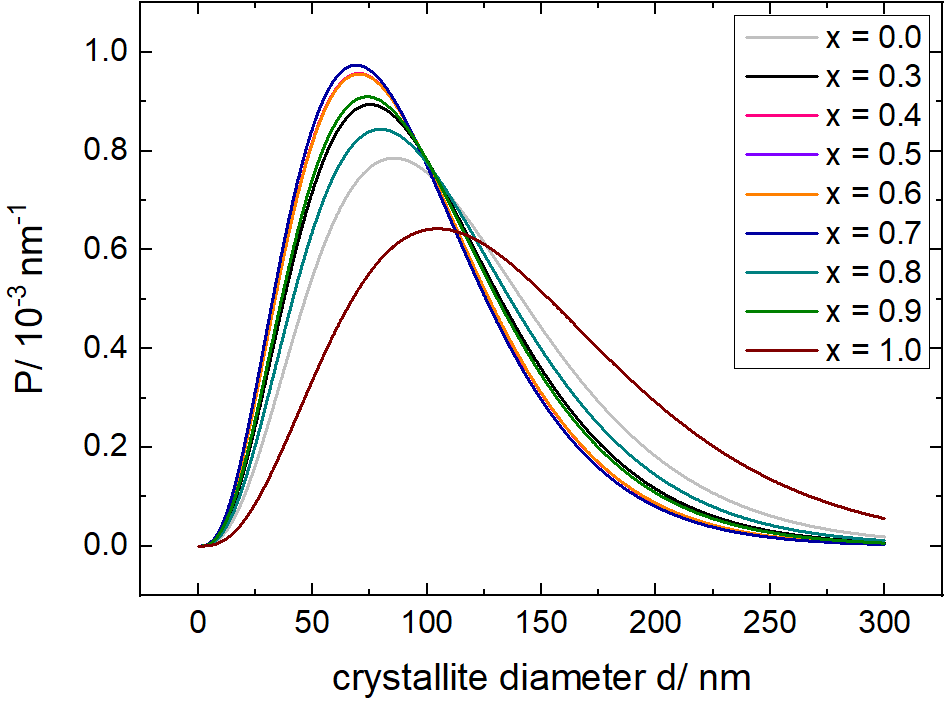
**

**Figure S18**: EnvACS crystallite diameter distribution in Pb2(Pb1-xSnx)O4 with respect to compositional x.


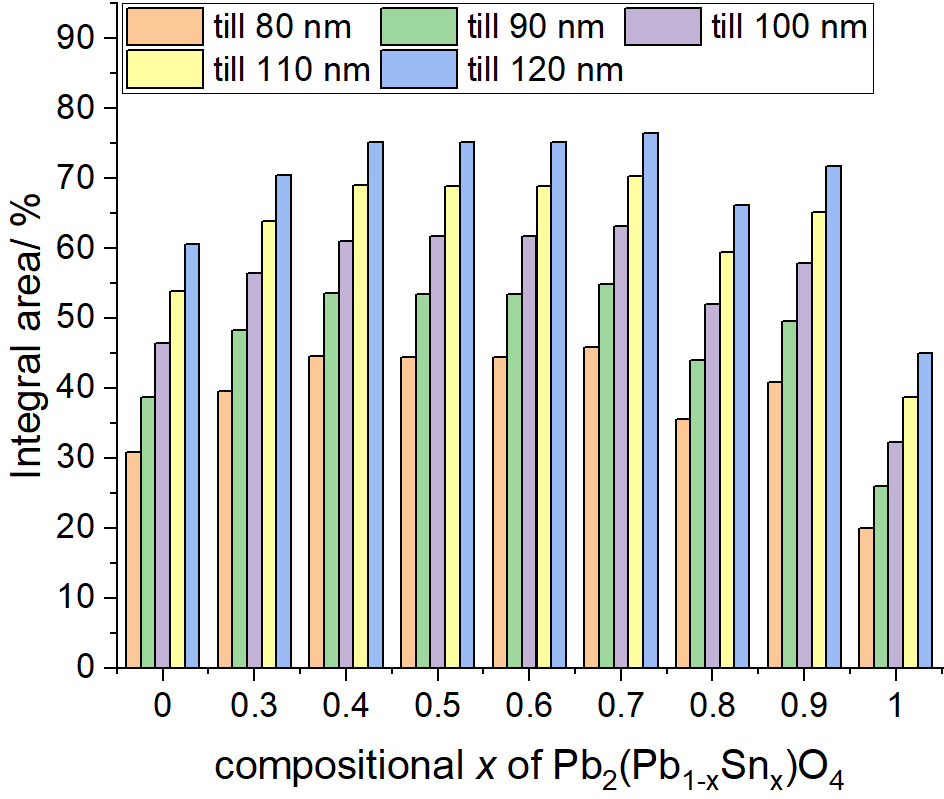


**Figure S19**: EnvACS crystallite diameter distribution area integral from 80- to 120 nm in Pb2(Pb1-xSnx)O4 with respect to compositional x.


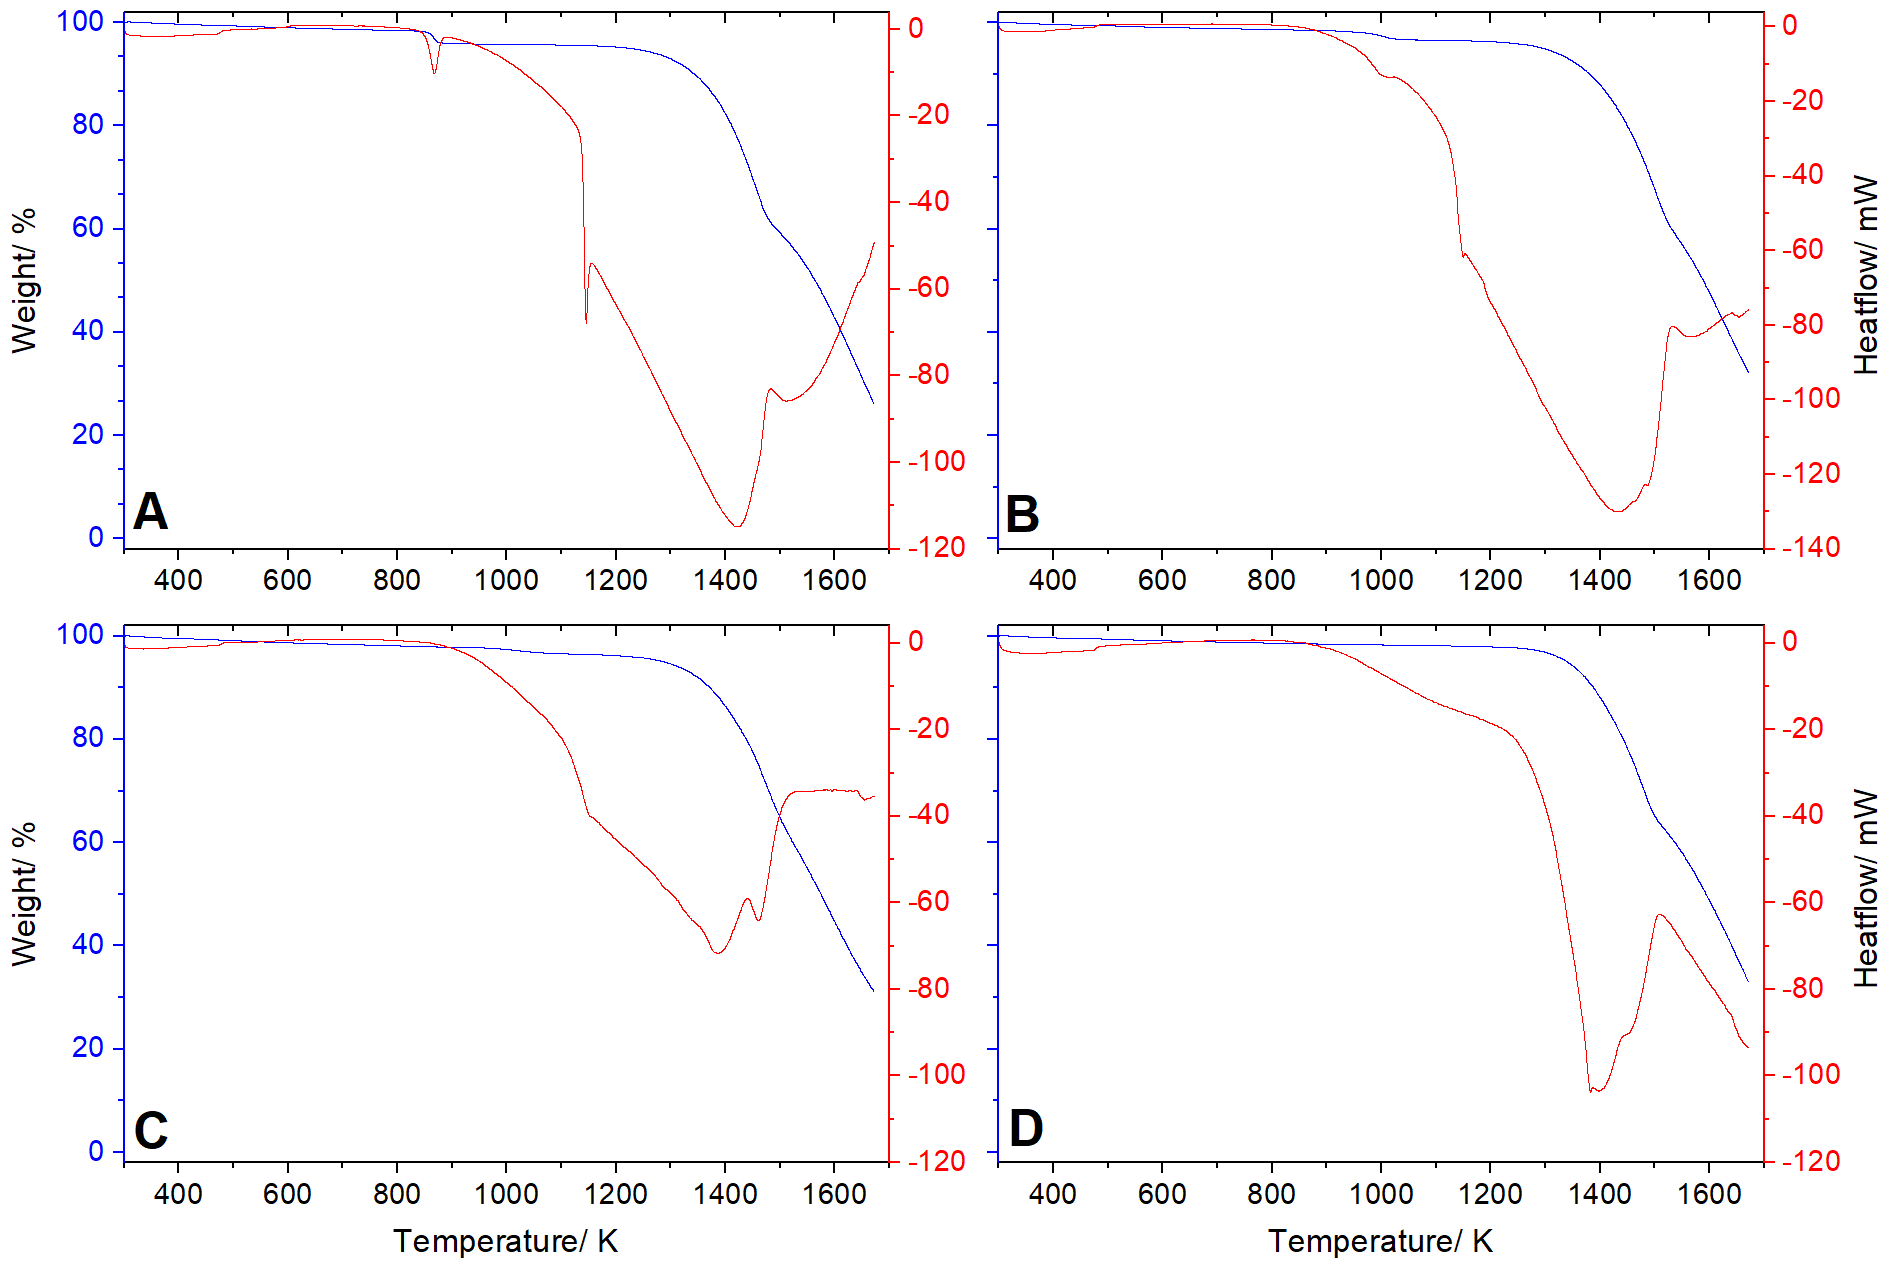


**Figure S20**: TG-DSC for Pb2(Pb1-xSnx)O4 for x = 0 (**A**), 0.3 (**B**), 0.6 (**C**) and 1.0 (**D**).
